# Supplementary material for: Asymmetric aziridination of chalcones catalyzed by a novel backbone 1,8-bisoxazolinylanthracene (AnBOX)-copper complexElectronic supplementary information (ESI) available: characterization data, 1H NMR and 13C NMR spectra for the ligand AnBOX 1 and all unknown compounds 3, and HPLC chromatograms for the determination of the ee values of all the aziridine derivatives 3. See http://www.rsc.org/suppdata/cc/b4/b404134h/
Source: Royal Society of Chemistry journal article supplement (doi:10.1039/b404134h), 2004-01-01

# Asymmetric Aziridination of Chalcones Catalyzed by a Novel Backbone 1,8-Bisoxazolinylnanthracene (AnBOX)-Copper Complex

Jiaxi Xu,\* Linge Ma, and Peng Jiao

*Key Laboratory of Bioorganic Chemistry and Molecular Engineering, of Ministry of Education, Department of Chemical Biology, College of Chemistry and Molecular Engineering, Peking University, Beijing 100871, P. R. China.*

*jxxu@chem.pku.edu.cn*

## Electronic Supplementary Information

### Experimental Section

**General Methods.** IR spectra were recorded on a Bruker Vector 22 FT-IR spectrophotometer. <sup>1</sup>H NMR and <sup>13</sup>C NMR spectra were recorded on a Varian Mercury 200 (200 MHz) and Mercury Plus 300 (300 MHz) spectrometer in CDCl<sub>3</sub> solution with TMS as an internal standard and chemical shifts are reported in ppm. Mass spectra were obtained on a VG-ZAB-HS spectrometer. CH analyses were performed on an Elementar Vario EL analyzer. Optical rotations were measured on a Perkin-Elmer Model 341LC polarimeter with a thermally jacketed 10 cm cell (concentration c given as g/100 mL). HPLC analyses were performed on an HP1100 HPLC equipment. The e.e. values were determined by HPLC analysis with chiralcel AS, OD or OD-H columns (4.6×250 mm) with a mixture of hexane-isopropanol as an eluent at an eluent rate of 0.5 or 0.8 mL/min at monitoring wave 254 nm. All chalcones were prepared according to the literature procedure.<sup>1</sup> TsN=IPh was prepared according to the literature method.<sup>2</sup> CuOTf<sup>1/2</sup>PhH was purchased from Aldrich. Benzene was heated under reflux over sodium and distilled prior to use. Dichloromethane and acetonitrile were refluxed and distilled from calcium hydride prior to use. All reactions were carried out under an atmosphere of nitrogen in gas burner-dried glassware with magnetic stirring.

**Synthesis of chiral ligand AnBOX:** Anthracene-1,8-dicarboxylic acid was prepared as previously reported<sup>3</sup> and anthracene-1,8-dicarbonyl dichloride was synthesized according to the literature procedure.<sup>4</sup>

**(S,S)-N,N'-Bis[1-(hydroxymethyl)-2-methylpropyl]-anthracene-1,8-dicarboxamide**

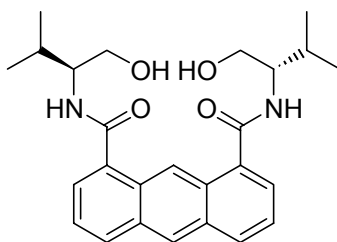

A 250 mL flask fitted with a magnetic stir bar was charged with a solution of 0.87 g (2.9 mmol) anthracene-1,8-dicarbonyl dichloride in 50 mL of dry THF. The solution was cooled in an ice bath, and a solution of 0.89 g (8.7) L-valinol in 30 mL of dry THF was added dropwise. Some yellow solid was observed. After addition, the ice bath was removed and the yellow suspension was stirred at room temperature overnight, then filtered to give yellow crude product, which was recrystallized from ethanol to afford 1.04 g of yellow needle crystals in 83% yield. mp 252-254 °C; TLC ethyl acetate,  $R_f = 0.47$ ;  $[\alpha]_D^{24} = -65.9$  ( $c$  0.41, CH<sub>3</sub>OH); IR (KBr)  $\nu$  cm<sup>-1</sup> 3314 (O-H), 1635 (C=O); <sup>1</sup>H NMR (400 MHz, DMSO-d<sub>6</sub>/TMS)  $\delta$  0.95 (d,  $J = 6.8$  Hz, 6H, 2CH<sub>3</sub>), 1.01 (d,  $J = 6.8$  Hz, 6H, 2CH<sub>3</sub>), 1.97-2.02 [m, 2H, 2CH(CH<sub>3</sub>)<sub>2</sub>], 3.55-3.58 (m, 4H, 2CH<sub>2</sub>O), 3.93-3.97 (m, 2H, 2CHNH), 4.62 (t,  $J = 5.6$  Hz, 2H, 2OH), 7.53-7.61 (m, 4H, 2NH, 2ArH), 8.15-8.19 (m, 2H, ArH), 8.66 (s, 1H, ArH), 9.18 (s, 1H, ArH); <sup>13</sup>C NMR (100 MHz, DMSO-d<sub>6</sub>/TMS)  $\delta$  18.33, 19.84, 28.38, 56.21, 61.48, 123.09, 124.76, 124.97, 126.79, 128.19, 129.56, 131.04, 135.96, 168.54; MS (EI)  $m/z$  (relative intensity, %): 436 (9, M<sup>+</sup>), 418 (6, M-H<sub>2</sub>O), 406 (38), 388 (17), 357 (4), 348 (5), 334 (33), 316 (27), 307 (23), 289 (35), 272 (35), 248 (61), 233 (13), 221 (16), 204 (36), 190 (5), 176 (33); Anal. Calcd for C<sub>26</sub>H<sub>32</sub>N<sub>2</sub>O<sub>4</sub>: C, 71.53; H, 7.39; N, 6.42. Found: C, 71.72; H, 7.28; N, 6.12.

**(S,S)-1,8-Bis[4-(1-methylethyl)oxazolin-2-yl]anthracene (AnBOX)**

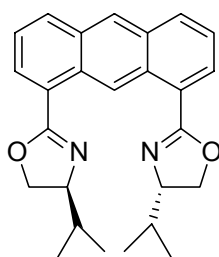

A 250 mL flask fitted with a magnetic stir bar was charged with a solution of 1.04 g (2.39 mmol) above dihydroxy diamide in 80 mL of dry THF, 12.1 mL (166 mmol) of SOCl<sub>2</sub> was added and the reaction mixture was brought to reflux for 4 h to give clear yellow solution. The resulting solution was evaporated *in vacuo* to remove THF and excess SOCl<sub>2</sub>. The residue was dissolved in 120 mL of ethyl acetate, then washed with 48 mL of 2 M K<sub>2</sub>CO<sub>3</sub>, water, and brine, respectively. The organic layer was dried over Na<sub>2</sub>SO<sub>4</sub>, filtered, and concentrated *in vacuo* to yield yellow solid, which was used without purification. The yellow solid was dissolved in 112 mL of acetonitrile, then 24.2 g (175 mmol) K<sub>2</sub>CO<sub>3</sub> and 9.7 mL of water were added. After refluxing for 8 h, the resulting solution was cooled to room temperature and concentrated, then 640 mL of ethyl acetate and 160 mL of water were added. The organic extract was dried over Na<sub>2</sub>SO<sub>4</sub>, filtered, and concentrated to give crude product, which was purified by column chromatography (silica gel 50 g, ethyl acetate: petroleum 1:4 (v/v)) to afford 0.77 g of yellow crystals in 80% yield. mp 122-124 °C; TLC ethyl acetate: petroleum 1:2 (v/v),  $R_f = 0.35$ ;  $[\alpha]_D^{20} = +64.7$  ( $c$  0.97, CHCl<sub>3</sub>); IR (KBr)  $\nu$  cm<sup>-1</sup> 1645 (C=N); <sup>1</sup>H NMR  $\delta$  1.03 (d,  $J = 6.9$  Hz, 6H, 2CH<sub>3</sub>), 1.15 (d,  $J = 6.9$  Hz, 6H,

2CH<sub>3</sub>), 2.00-2.06 (m, 2H, 2CH(CH<sub>3</sub>)<sub>2</sub>), 4.23-4.33 (m, 4H, 2CH<sub>2</sub>O), 4.51-4.56 (m, 2H, 2CHN), 7.48 (dd, *J* = 8.4, 6.9 Hz, 2H, ArH), 8.08-8.13 (m, 4H, ArH), 8.47 (s, 1H, ArH), 10.64 (s, 1H, ArH); <sup>13</sup>C NMR δ 18.09, 19.37, 32.84, 69.47, 73.24, 124.47, 124.88, 125.90, 127.54, 129.38, 129.48, 131.46, 131.74, 163.80; MS (EI) *m/z* (rel. intensity): 400 (22.2, M<sup>+</sup>), 357 (18.7, M-C<sub>3</sub>H<sub>7</sub>), 330 (100.0), 287 (7.9), 271 (72.4), 244 (24.0), 228 (6.0), 216 (11.5), 202 (11.9), 190 (4.1), 176 (4.3); Anal. calcd for C<sub>26</sub>H<sub>28</sub>N<sub>2</sub>O<sub>2</sub>: C 77.97, H 7.05, N 6.99; Found: C 77.99, H 7.26, N 6.76.

**Asymmetric aziridination of chalcones, general procedure:** A three-necked flask (25 mL) is charged with chalcone **2a** (312 mg, 1.50 mmol), AnBOX **1** (24 mg, 0.06 mmol) and the CuOTf · 1/2PhH (13 mg, 0.05 mmol) under nitrogen atmosphere. Dichloromethane (8 mL) is added by syringe and the resulting mixture is stirred for 1 h at 24 °C. PhI=NTs (373 mg, 1.00 mmol) is added portionwise to the mixture over 2 h. After the addition, the reaction mixture is kept stirring for another 3 h. The aziridine product is obtained after flash silica gel chromatography with a mixture of petroleum ether (60-90 °C) and ethyl acetate (6:1, v/v) as an eluent.

**(2*S*,3*R*)-2-Benzoyl-3-phenyl-1-(*p*-toluenesulfonyl)aziridine (**3a**) (Entry 3):**

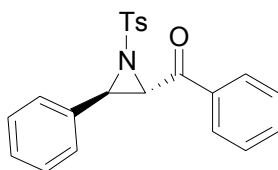

Colorless crystal, yield 80%; mp 112-114 °C [Lit<sup>5</sup>. (2*R*,3*S*)-enantiomer, 86% ee, mp 109.0-110.5], TLC ethyl acetate: petroleum 1:5 (v/v), *R<sub>f</sub>* 0.20; The ee of the product was determined by HPLC with Chiralcel OD column with hexane/2-propanol (90:10, v/v) as an eluent at flow rate 0.8 mL/min ( $\tau_{\text{major}} = 30.5$  min;  $\tau_{\text{minor}} = 35.9$  min).  $[\alpha]_{\text{D}}^{20} = +5.70$  (*c* 1.00, CHCl<sub>3</sub>, 96% ee) [Lit<sup>3</sup>. (2*R*,3*S*)-enantiomer,  $[\alpha]_{\text{D}}^{24} = -5.24$  (*c* 0.85, CHCl<sub>3</sub>, 86% ee)]; IR (KBr)  $\nu$  cm<sup>-1</sup> 1688 (s), 1332 (s), 1161 (s); <sup>1</sup>H NMR δ 2.40 (s, 3H, CH<sub>3</sub>), 4.29 (d, *J* = 5.2 Hz, 1H, CH), 4.52 (d, *J* = 5.2 Hz, 1H, CH), 7.22-7.26 (m, 2H, ArH), 7.34-7.38 (m, 5H, ArH), 7.46-7.51 (m, 2H, ArH), 7.60-7.65 (m, 1H, ArH), 7.72 (d, *J* = 8.5 Hz, 2H, ArH), 8.06 (d, *J* = 8.5 Hz, 2H, ArH); <sup>13</sup>C NMR δ 21.60, 47.47, 50.18, 127.51, 127.67, 128.63, 128.78, 128.93, 129.46, 132.88, 134.10, 135.92, 136.56, 144.36, 190.33. MS (EI) *m/z* (relative intensity, %): 377 (M<sup>+</sup>, 6), 221 (M<sup>+</sup>-Ts, 99), 105 (PhCO<sup>+</sup>, 100), 77 (Ph<sup>+</sup>, 79). Anal. Calcd for C<sub>22</sub>H<sub>19</sub>NO<sub>3</sub>S: C, 70.00; H, 5.07; N, 3.71. Found: C, 70.06; H, 5.12; N, 3.58.

**(2*R*,3*S*)-2-Benzoyl-3-phenyl-1-(*p*-toluenesulfonyl)aziridine (**3'a**) (Entry 9):**

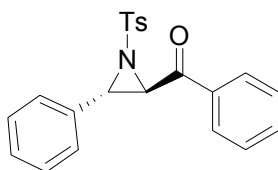

Colorless crystal, yield 38%; mp 109-111 °C; [Lit<sup>5</sup>. mp 109.0-110.5, 86% ee], TLC ethyl acetate: petroleum 1:5 (v/v), *R<sub>f</sub>* 0.20; The ee of the product was determined by HPLC with Chiralcel OD column with hexane/2-propanol (90:10, v/v) as an eluent at flow rate 0.8 mL/min ( $\tau_{\text{minor}} = 28.9$  min;  $\tau_{\text{major}} = 33.1$  min).  $[\alpha]_{\text{D}}^{20} = -5.21$  (*c* 1.01, CHCl<sub>3</sub>, 86% ee) [Lit<sup>3</sup>.  $[\alpha]_{\text{D}}^{24} = -5.24$  (*c* 0.85, CHCl<sub>3</sub>, 86% ee)].

**(2*S*,3*R*)-2-Benzoyl-3-(*p*-tolyl)-1-(*p*-toluenesulfonyl)aziridine (**3b**):**

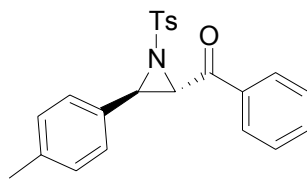

Colorless crystal, yield 86%; mp 133-135 °C; TLC ethyl acetate: petroleum 1:6 (v/v),  $R_f$  0.20; The ee of the product was determined by HPLC with Chiralcel OD column with hexane/2-propanol (90:10, v/v) as an eluent at flow rate 0.8 mL/min ( $\tau_{\text{major}} = 23.7$  min;  $\tau_{\text{minor}} = 27.4$  min):  $[\alpha]_{\text{D}}^{20} = -3.09$  ( $c$  0.91,  $\text{CHCl}_3$ , 98% ee); IR (KBr)  $\nu$   $\text{cm}^{-1}$  1687 (s), 1332 (s), 1162 (s);  $^1\text{H}$  NMR  $\delta$  2.35 (s, 3H,  $\text{CH}_3$ ), 2.40 (s, 3H,  $\text{CH}_3$ ), 4.33 (d,  $J = 4.3$  Hz, 1H, CH), 4.46 (d,  $J = 4.3$  Hz, 1H, CH), 7.15 (d,  $J = 7.8$  Hz, 2H, ArH), 7.22-7.26 (m, 4H, ArH), 7.46-7.51 (m, 2H, ArH), 7.60-7.62 (m, 1H, ArH), 7.72 (d,  $J = 8.1$  Hz, 2H, ArH), 8.04-8.06 (m, 2H, ArH);  $^{13}\text{C}$  NMR  $\delta$  21.24, 21.60, 47.89, 49.74, 127.66, 128.79, 128.89, 129.31, 129.45, 129.57, 134.06, 135.90, 136.70, 138.89, 144.29, 190.53. MS (EI)  $m/z$  (relative intensity, %): 391 ( $\text{M}^+$ , 14), 235 ( $\text{M}^+$ -Ts-H, 100), 130 ( $\text{M}^+$ -Ts-H-PhCO, 16) 105 ( $\text{PhCO}^+$ , 65), 91 ( $\text{CH}_3\text{C}_6\text{H}_4^+$ , 35), 77 ( $\text{Ph}^+$ , 58). Anal. Calcd for  $\text{C}_{23}\text{H}_{21}\text{NO}_3\text{S}$ : C, 70.56; H, 5.41; N, 3.58. Found: C, 70.51; H, 5.47; N, 3.40.

Note: 2-(*p*-Toluoyl)-3-(*p*-tolyl)-1-(*p*-toluenesulfonyl)aziridine (**3b**) was assigned as (2*S*,3*R*) configuration based on the same reaction mechanism and relative retention times although it has a minus sign of specific rotation.

**(2*S*,3*R*)-2-Benzoyl-3-(4-chlorophenyl)-1-(*p*-toluenesulfonyl)aziridine (**3c**):**

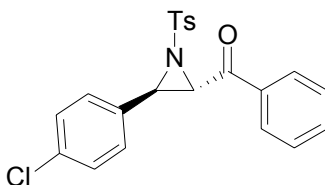

Colorless crystal, yield 70%; mp 153-154 °C; TLC ethyl acetate: petroleum 1:6,  $R_f$  0.26; The ee of the product was determined by HPLC with Chiralcel OD column with hexane/2-propanol (90:10, v/v) as an eluent at flow rate 0.8 mL/min ( $\tau_{\text{major}} = 32.0$  min;  $\tau_{\text{minor}} = 47.7$  min):  $[\alpha]_{\text{D}}^{20} +3.11$  ( $c$  1.03,  $\text{CHCl}_3$ , 76% ee); IR (KBr)  $\nu$   $\text{cm}^{-1}$  1688 (s), 1332 (s), 1162 (s);  $^1\text{H}$  NMR  $\delta$  2.40 (s, 3H,  $\text{CH}_3$ ), 4.24 (d,  $J = 4.3$  Hz, 1H, CH), 4.48 (d,  $J = 4.3$  Hz, 1H, CH), 7.22-7.31 (m, 6H, ArH), 7.45-7.52 (m, 2H, ArH), 7.59-7.63 (m, 1H, ArH), 7.69-7.73 (m, 2H, ArH), 8.01-8.06 (m, 2H, ArH);  $^{13}\text{C}$  NMR  $\delta$  21.56, 46.62, 50.20, 127.72, 128.81, 128.88, 128.91, 128.95, 129.56, 131.56, 134.13, 134.91, 135.93, 136.53, 144.54, 190.02. MS (EI)  $m/z$  (relative intensity, %): 411 ( $\text{M}^+$ , 6), 255 ( $\text{M}^+$ -Ts-H, 100), 105 ( $\text{PhCO}^+$ , 78), 77 ( $\text{Ph}^+$ , 70). Anal. Calcd for  $\text{C}_{22}\text{H}_{18}\text{ClNO}_3\text{S}$ : C, 64.15; H, 4.40; N, 3.40. Found: C, 64.12; H, 4.44; N, 3.14.

**(2*S*,3*R*)-2-Benzoyl-3-(3-chlorophenyl)-1-(*p*-toluenesulfonyl)aziridine (3d):**

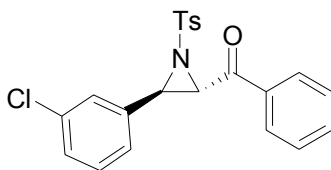

Colorless crystal, yield 76%; mp 140-142 °C ; TLC ethyl acetate: petroleum 1:6 (v/v),  $R_f$  0.33; The ee of the product was determined by HPLC with Chiralcel OD column with hexane/2-propanol (90:10, v/v) as an eluent at flow rate 0.8 mL/min ( $\tau_{\text{major}} = 28.6$  min;  $\tau_{\text{minor}} = 38.1$  min):  $[\alpha]_{\text{D}}^{20} = +12.2$  ( $c$  1.06,  $\text{CHCl}_3$ , 84% ee); IR (KBr)  $\nu$   $\text{cm}^{-1}$  1689 (s), 1333 (s), 1161 (s);  $^1\text{H}$  NMR  $\delta$  2.41 (s, 3H,  $\text{CH}_3$ ), 4.20 (d,  $J = 4.2$  Hz, 1H, CH), 4.50 (d,  $J = 4.2$  Hz, 1H, CH), 7.21-7.23 (m, 1H, ArH), 7.25-7.32 (m, 5H, ArH), 7.46-7.52 (m, 2H, ArH), 7.61-7.66 (m, 1H, ArH), 7.69-7.72 (m, 2H, ArH), 8.03-8.06 (m, 2H, ArH);  $^{13}\text{C}$  NMR  $\delta$  21.63, 46.04, 50.48, 125.70, 127.37, 127.76, 128.81, 128.98, 129.03, 129.58, 129.91, 134.20, 134.63, 135.21, 135.81, 136.16, 144.65, 189.87. MS (EI)  $m/z$  (relative intensity, %): 411 ( $\text{M}^+$ , 5), 255 ( $\text{M}^+$ -Ts-H, 100), 105 ( $\text{PhCO}^+$ , 67). Anal. Calcd for  $\text{C}_{22}\text{H}_{18}\text{ClNO}_3\text{S}$ : C, 64.15; H, 4.40; N, 3.40. Found: C, 64.11; H, 4.30; N, 3.35.

**(2*S*,3*R*)-2-Benzoyl-3-(2-chlorophenyl)-1-(*p*-toluenesulfonyl)aziridine (3e):**

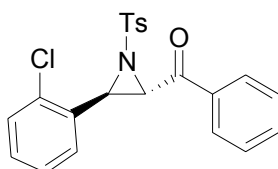

Colorless crystal, yield 91%; mp 129-130 °C ; TLC ethyl acetate: petroleum 1:5 (v/v),  $R_f$  0.33; The ee of the product was determined by HPLC with Chiralpak AS column with hexane/2-propanol (90:10, v/v) as an eluent at flow rate 0.8 mL/min ( $\tau_{\text{major}} = 67.2$  min;  $\tau_{\text{minor}} = 83.2$  min):  $[\alpha]_{\text{D}}^{20} = +12.3$  ( $c$  1.06,  $\text{CHCl}_3$ , 79% ee); IR (KBr)  $\nu$   $\text{cm}^{-1}$  1688 (s), 1334 (s), 1162 (s);  $^1\text{H}$  NMR  $\delta$  2.42 (s, 3H,  $\text{CH}_3$ ), 4.21 (d,  $J = 4.0$  Hz, 1H, CH), 4.78 (d,  $J = 4.0$  Hz, 1H, CH), 7.20-7.29 (m, 5H, ArH), 7.34-7.38 (m, 1H, ArH), 7.45-7.52 (m, 2H, ArH), 7.59-7.66 (m, 1H, ArH), 7.75 (d,  $J = 8.4$  Hz, 2H, ArH), 8.07 (d,  $J = 7.0$  Hz, 2H, ArH);  $^{13}\text{C}$  NMR  $\delta$  21.62, 45.59, 49.42, 126.86, 127.92, 128.24, 128.75, 128.99, 129.46, 129.54, 129.90, 131.45, 134.02, 134.84, 136.04, 144.55, 155.02, 189.73. MS (EI)  $m/z$  (relative intensity, %): 411 ( $\text{M}^+$ , 21), 376 ( $\text{M}^+$ -Cl, 72), 255 ( $\text{M}^+$ -Ts-H, 100), 220 ( $\text{M}^+$ -Ts-H-Cl, 6), 150 ( $\text{M}^+$ -Ts-H-PhCO, 14), 105 ( $\text{PhCO}^+$ , 61), 77 ( $\text{Ph}^+$ , 78). Anal. Calcd for  $\text{C}_{22}\text{H}_{18}\text{ClNO}_3\text{S}$ : C, 64.15; H, 4.40; N, 3.40. Found: C, 63.97; H, 4.32; N, 3.18.

**(2*S*,3*R*)-2-Benzoyl-3-(3-fluorophenyl)-1-(*p*-toluenesulfonyl)aziridine (3f):**

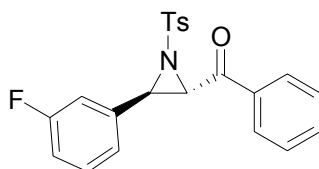

Colorless crystal, yield 85%; mp 108-111 °C ; TLC ethyl acetate: petroleum 1:6 (v/v),  $R_f$  0.18; The ee of the product was determined by HPLC with Chiralcel OD column with hexane/2-propanol (90:10, v/v) as an eluent at flow rate 0.8 mL/min ( $\tau_{\text{major}} = 27.1$  min;  $\tau_{\text{minor}} = 36.2$  min):  $[\alpha]_{\text{D}}^{20} = +12.0$  ( $c$  1.03,  $\text{CHCl}_3$ , 71% ee); IR (KBr)  $\nu$   $\text{cm}^{-1}$  1684 (s), 1333 (s), 1161 (s);  $^1\text{H}$  NMR  $\delta$  2.41 (s, 3H,  $\text{CH}_3$ ), 4.19 (d,  $J = 4.2$  Hz, 1H, CH), 4.53 (d,  $J = 4.2$  Hz,

1H, CH), 6.98-7.06 (m, 2H, CH), 7.13-7.17 (m, 1H, ArH), 7.23-7.33 (m, 3H, ArH), 7.45-7.53 (m, 2H, ArH), 7.60-7.65 (m, 1H, ArH), 7.70-7.74 (m, 2H, ArH), 8.02-8.06 (m, 2H, ArH); <sup>13</sup>C NMR δ 21.59, 46.22, 50.71, 114.22 (d, <sup>2</sup>J<sub>F-C-C</sub> = 22.9 Hz), 115.88 (d, <sup>2</sup>J<sub>F-C-C</sub> = 21.0 Hz), 123.26, 123.31, 127.76, 128.81, 128.99, 129.58, 130.37, 133.00 (d, <sup>1</sup>J<sub>F-C</sub> = 288.8 Hz), 134.13, 135.98, 136.49, 144.57, 189.88. MS (EI) *m/z* (relative intensity, %): 395 (M<sup>+</sup>, 5), 240 (M<sup>+</sup>-Ts, 48), 105 (PhCO<sup>+</sup>, 100), 77 (Ph<sup>+</sup>, 67). Anal. Calcd for C<sub>22</sub>H<sub>18</sub>FNO<sub>3</sub>S: C, 66.82; H, 4.59; N, 3.54. Found: C, 66.81, H, 4.72, N, 3.40.

**(2*S*,3*R*)-3-Phenyl-2-(*p*-toluoyl)-1-(*p*-toluenesulfonyl)aziridine (3g):**

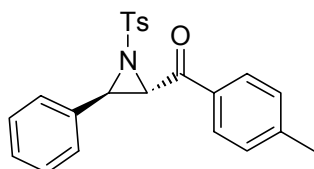

Colorless needle crystal, yield 92%; mp 138-139 °C; TLC ethyl acetate: petroleum 1:6 (v/v), *R<sub>f</sub>* 0.23; The ee of the product was determined by HPLC with Chiralcel OD column with hexane/2-propanol (90:10, v/v) as an eluent at flow rate 0.8 mL/min ( $\tau_{\text{major}} = 27.8$  min):  $[\alpha]_{\text{D}}^{20} = +4.00$  (*c* 0.93, CHCl<sub>3</sub>, >99.9% ee); IR (KBr)  $\nu$  cm<sup>-1</sup> 1683 (s), 1331 (s), 1162 (s); <sup>1</sup>H NMR δ 2.40 (s, 3H, CH<sub>3</sub>), 2.43 (s, 3H, CH<sub>3</sub>), 4.28 (d, *J* = 4.2 Hz, 1H, CH), 4.50 (d, *J* = 4.2 Hz, 1H, CH), 7.20 (m, 3H, ArH), 7.24-7.26 (m, 1H, ArH), 7.30-7.33 (m, 5H, ArH), 7.72 (d, *J* = 8.6 Hz, 2H, ArH), 7.96 (d, *J* = 8.2 Hz, 2H, ArH); <sup>13</sup>C NMR δ 21.55, 21.76, 47.48, 50.13, 127.56, 127.71, 128.58, 128.80, 129.06, 129.45, 129.46, 133.02, 133.62, 136.76, 144.25, 145.14, 189.76. MS (EI) *m/z* (relative intensity, %): 391 (M<sup>+</sup>, 13), 236 (M<sup>+</sup>-Ts, 77), 119 (CH<sub>3</sub>C<sub>6</sub>H<sub>4</sub>CO<sup>+</sup>, 100), 91 (CH<sub>3</sub>C<sub>6</sub>H<sub>4</sub><sup>+</sup>, 68), 77 (Ph<sup>+</sup>, 10). Anal. Calcd for C<sub>23</sub>H<sub>21</sub>NO<sub>3</sub>S: C, 70.56; H, 5.41; N, 3.58. Found: C, 70.50; H, 5.40; N, 3.32.

**(2*S*,3*R*)-2-(*p*-Toluoyl)-3-(*p*-tolyl)-1-(*p*-toluenesulfonyl)aziridine (3h):**

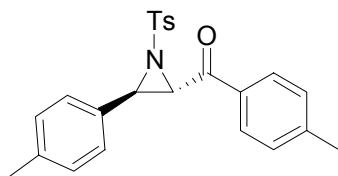

Colorless crystal, yield 59%; mp 168-170 °C; TLC ethyl acetate: petroleum 1:5 (v/v), *R<sub>f</sub>* 0.27; The ee of the product was determined by HPLC with Chiralcel OD column with hexane/2-propanol (90:10, v/v) as an eluent at flow rate 0.8 mL/min ( $\tau_{\text{major}} = 24.5$  min);  $[\alpha]_{\text{D}}^{20} = -5.83$  (*c* 0.60, CHCl<sub>3</sub>, > 99.9% ee); IR (KBr)  $\nu$  cm<sup>-1</sup> 1680 (s), 1331 (s), 1161 (s); <sup>1</sup>H NMR δ 2.34 (s, 3H, CH<sub>3</sub>), 2.39 (s, 3H, CH<sub>3</sub>), 2.43 (s, 3H, CH<sub>3</sub>), 4.32 (d, *J* = 4.4 Hz, 1H, CH), 4.44 (d, *J* = 4.4 Hz, 1H, CH), 7.14 (d, *J* = 8.1 Hz, 2H, ArH), 7.22 (d, *J* = 5.4 Hz, 2H, ArH), 7.24 (d, *J* = 5.4 Hz, 2H, ArH), 7.28 (d, *J* = 8.4 Hz, 2H, ArH), 7.72 (d, *J* = 8.4 Hz, 2H, ArH), 7.95 (d, *J* = 8.1 Hz, 2H, ArH); <sup>13</sup>C NMR δ 21.24, 21.60, 21.81, 47.86, 49.73, 127.63, 129.02, 129.28, 129.45, 129.65, 133.49, 136.75, 138.82, 144.22, 145.17, 189.98. MS (EI) *m/z* (relative intensity, %): 405 (M<sup>+</sup>, 36), 249 (M<sup>+</sup>-Ts-H, 100), 119 (CH<sub>3</sub>C<sub>6</sub>H<sub>4</sub>CO<sup>+</sup>, 67), 91 (CH<sub>3</sub>C<sub>6</sub>H<sub>4</sub><sup>+</sup>, 75). Anal. Calcd for C<sub>24</sub>H<sub>23</sub>NO<sub>3</sub>S: C, 71.09; H, 5.72; N, 3.45. Found: C, 70.98; H, 5.77; N, 3.28.

Note: 2-(*p*-Toluoyl)-3-(*p*-tolyl)-1-(*p*-toluenesulfonyl)aziridine (**3h**) was assigned as (2*S*,3*R*) configuration based on the same reaction mechanism and relative retention times in chiral column although it has a minus sign of specific rotation.

**(2*S*,3*R*)-2-(4-Chlorobenzoyl)-3-(*p*-tolyl)-1-(*p*-toluenesulfonyl)aziridine (**3i**):**

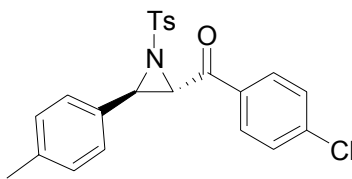

Colorless needle crystal, yield 51%; mp 159-161 °C ; TLC ethyl acetate: petroleum 1:6 (v/v),  $R_f$  0.39; The ee of the product was determined by HPLC with chiral OD-H column with hexane/2-propanol (90:10, v/v) as an eluent at flow rate 0.5 mL/min ( $\tau_{\text{major}} = 39.9$  min;  $\tau_{\text{minor}} = 45.5$  min):  $[\alpha]_{\text{D}}^{20} = +2.00$  ( $c$  0.55,  $\text{CHCl}_3$ , 68% ee); IR (KBr)  $\nu$   $\text{cm}^{-1}$  1686 (s), 1325 (s), 1161 (s);  $^1\text{H NMR}$   $\delta$  2.34 (s, 3H,  $\text{CH}_3$ ), 2.41 (s, 3H,  $\text{CH}_3$ ), 4.21 (d,  $J = 4.5$  Hz, 1H, CH), 4.47 (d,  $J = 4.5$  Hz, 1H, CH), 7.12- 7.26 (m, 6H, ArH), 7.45 (d,  $J = 9.0$  Hz, 2H, ArH), 7.71 (d,  $J = 8.2$  Hz, 2H, ArH), 8.00 (d,  $J = 8.6$  Hz, 2H, ArH);  $^{13}\text{C NMR}$   $\delta$  21.22, 21.60, 47.51, 49.87, 127.41, 127.63, 128.87, 129.11, 129.32, 129.50, 130.27, 134.24, 136.47, 138.91, 140.64, 144.45, 189.39. MS (EI)  $m/z$  (relative intensity, %): 425 ( $\text{M}^+$ , 46), 270 ( $\text{M}^+$ -Ts, 55), 139 ( $\text{ClC}_6\text{H}_4\text{CO}^+$ , 100), 91 ( $\text{CH}_3\text{C}_6\text{H}_4^+$ , 26). Anal. Calcd for  $\text{C}_{23}\text{H}_{20}\text{ClNO}_3\text{S}$ : C, 64.86; H, 4.73; N, 3.29. Found: C, 64.95; H, 4.82; N, 2.97.

**References**

1. Dippy, J. F. J.; Lewis, R. H. *Rec. Trav. Chim.* **1937**, *56*, 1000-1006.
2. Yamada, Y.; Yamamoto, T.; Okawara, M. *Chem. Lett.* **1975**, 361-362.
3. Roger, M. E.; Averill, B. A. *J. Org. Chem.*, **1986**, *51*, 3308-3314.
4. Waldmann, H.; Stengl, R. *Chem. Ber.*, **1950**, *83*, 167-170.
5. Suga, H.; Kakehi, A.; Ito, S.; Ibata, T.; Fudo, T.; Watanabe, Y.; Kinoshita, Y. *Bull. Chem. Soc. Jpn.* **2003**, *76*, 189-199.

3a

Racemate

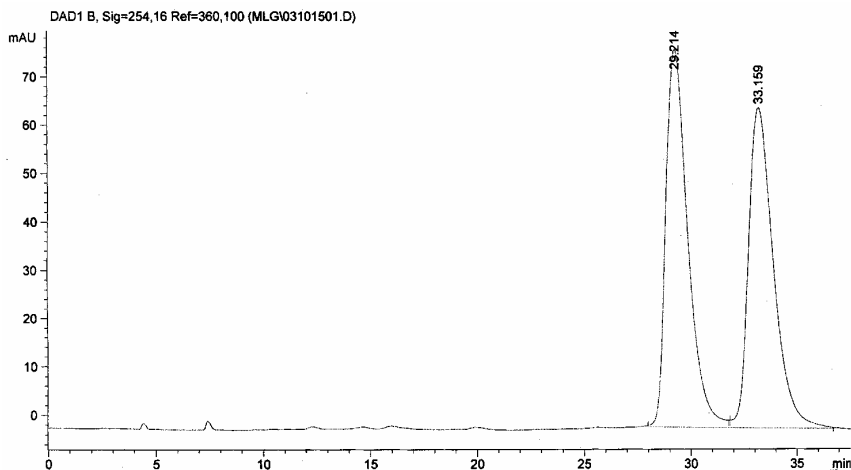

Area Percent Report

Sorted By : Signal  
Multiplier : 1.0000  
Dilution : 1.0000

Signal 1: DAD1 B, Sig=254,16 Ref=360,100

| Peak # | RetTime [min] | Type | Width [min] | Area [mAU*s] | Height [mAU] | Area %  |
|--------|---------------|------|-------------|--------------|--------------|---------|
| 1      | 29.214        | BB   | 1.0909      | 5594.80225   | 78.18256     | 50.6270 |
| 2      | 33.159        | BB   | 1.2603      | 5456.21777   | 66.28526     | 49.3730 |

Totals : 1.10510e4 144.46781

(2S,3R)-Enantiomer (major)

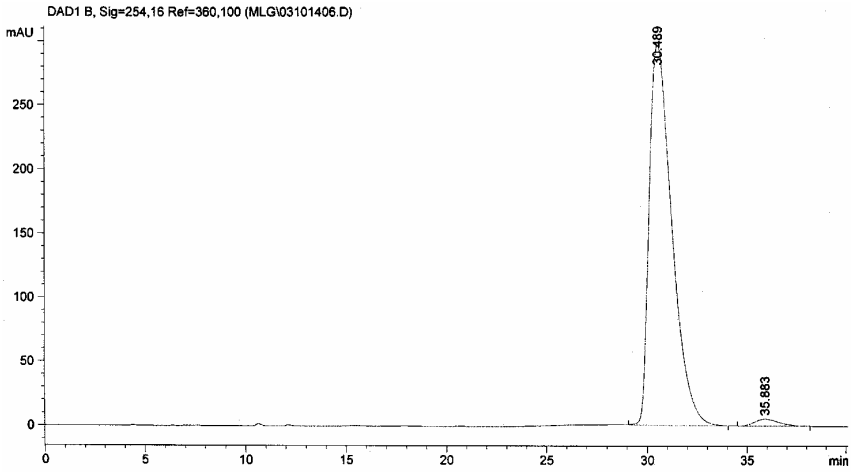

Area Percent Report

Sorted By : Signal  
Multiplier : 1.0000  
Dilution : 1.0000

Signal 1: DAD1 B, Sig=254,16 Ref=360,100

| Peak # | RetTime [min] | Type | Width [min] | Area [mAU*s] | Height [mAU] | Area %  |
|--------|---------------|------|-------------|--------------|--------------|---------|
| 1      | 30.489        | BB   | 1.2089      | 2.32998e4    | 296.45493    | 98.0230 |
| 2      | 35.883        | PB   | 1.2527      | 469.91885    | 5.43495      | 1.9770  |

Totals : 2.37698e4 301.88987



### 3b Racemate

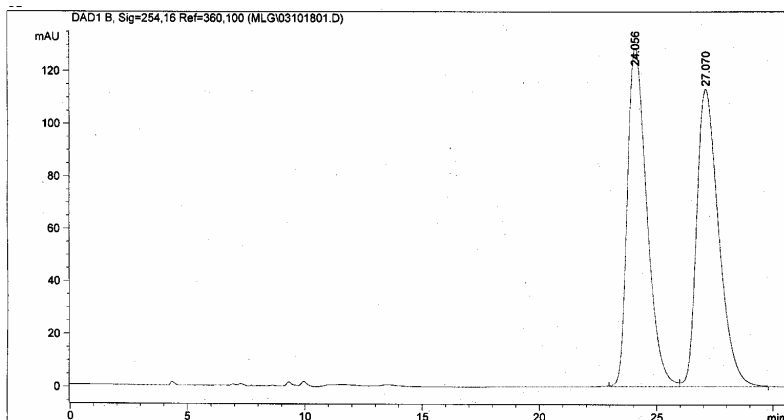

#### Area Percent Report

Sorted By : Signal  
Multiplier : 1.0000  
Dilution : 1.0000

Signal 1: DAD1 B, Sig=254,16 Ref=360,100

| Peak # | RetTime [min] | Type | Width [min] | Area [mAU*s] | Height [mAU] | Area %  |
|--------|---------------|------|-------------|--------------|--------------|---------|
| 1      | 24.056        | BV   | 0.8885      | 7396.33008   | 128.31975    | 49.8960 |
| 2      | 27.070        | VB   | 1.0214      | 7427.16895   | 112.61421    | 50.1040 |

Totals : 1.48235e4 240.93396

### (2S,3R)-Enantiomer

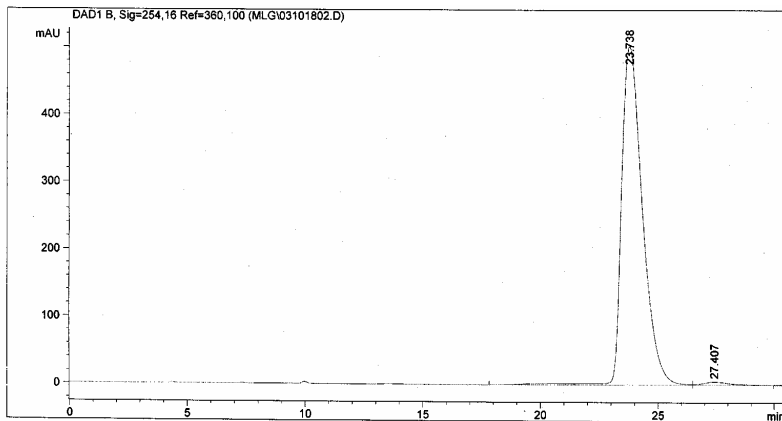

#### Area Percent Report

Sorted By : Signal  
Multiplier : 1.0000  
Dilution : 1.0000

Signal 1: DAD1 B, Sig=254,16 Ref=360,100

| Peak # | RetTime [min] | Type | Width [min] | Area [mAU*s] | Height [mAU] | Area %  |
|--------|---------------|------|-------------|--------------|--------------|---------|
| 1      | 23.738        | BV   | 0.9501      | 3.11078e4    | 502.60941    | 98.9505 |
| 2      | 27.407        | VB   | 0.9942      | 329.95178    | 4.59240      | 1.0495  |

Totals : 3.14377e4 507.20180

3c

Racemate

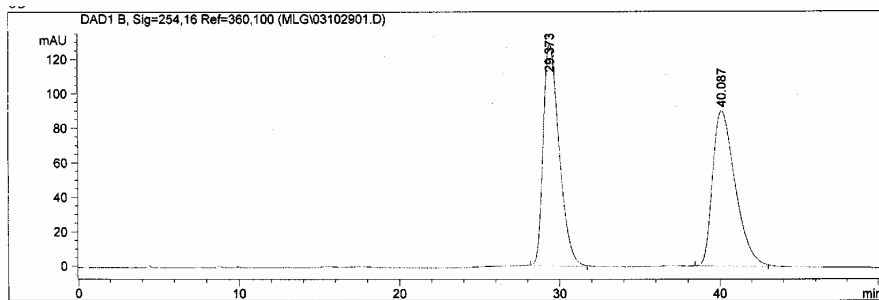

Area Percent Report

Sorted By : Signal  
Multiplier : 1.0000  
Dilution : 1.0000

Signal 1: DAD1 B, Sig=254,16 Ref=360,100

| Peak # | RetTime [min] | Type | Width [min] | Area [mAU*s] | Height [mAU] | Area %  |
|--------|---------------|------|-------------|--------------|--------------|---------|
| 1      | 29.373        | BB   | 1.0761      | 8951.78418   | 128.59756    | 50.1407 |
| 2      | 40.087        | BB   | 1.5202      | 8901.55078   | 90.13540     | 49.8593 |

Totals : 1.78533e4 218.73296

(2S,3R)-Enantiomer

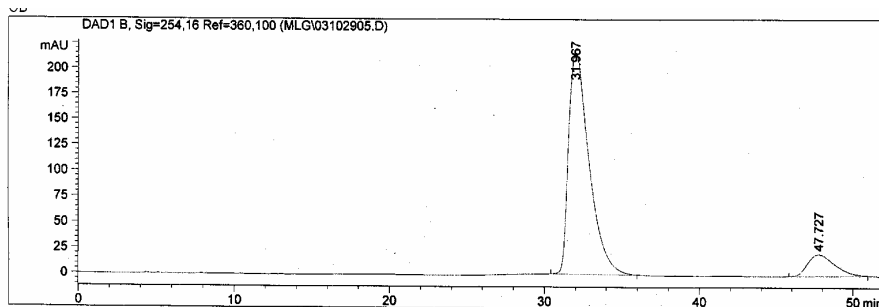

Area Percent Report

Sorted By : Signal  
Multiplier : 1.0000  
Dilution : 1.0000

Signal 1: DAD1 B, Sig=254,16 Ref=360,100

| Peak # | RetTime [min] | Type | Width [min] | Area [mAU*s] | Height [mAU] | Area %  |
|--------|---------------|------|-------------|--------------|--------------|---------|
| 1      | 31.967        | BB   | 1.3891      | 1.99454e4    | 216.85042    | 88.2261 |
| 2      | 47.727        | BB   | 1.5069      | 2661.74341   | 21.37369     | 11.7739 |

Totals : 2.26071e4 238.22410

### 3d Racemate

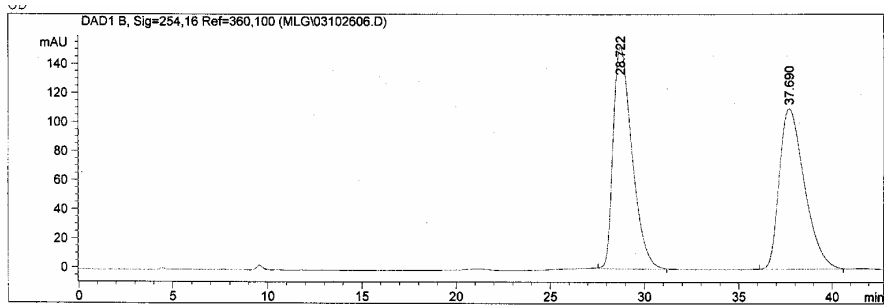

#### Area Percent Report

Sorted By : Signal  
Multiplier : 1.0000  
Dilution : 1.0000

Signal 1: DAD1 B, Sig=254,16 Ref=360,100

| Peak # | RetTime [min] | Type | Width [min] | Area [mAU*s] | Height [mAU] | Area %  |
|--------|---------------|------|-------------|--------------|--------------|---------|
| 1      | 28.722        | BB   | 1.0674      | 1.05851e4    | 152.19102    | 50.6737 |
| 2      | 37.690        | BB   | 1.4583      | 1.03036e4    | 110.25172    | 49.3263 |

Totals : 2.08887e4 262.44274

### (2S,3R)-Enantiomer

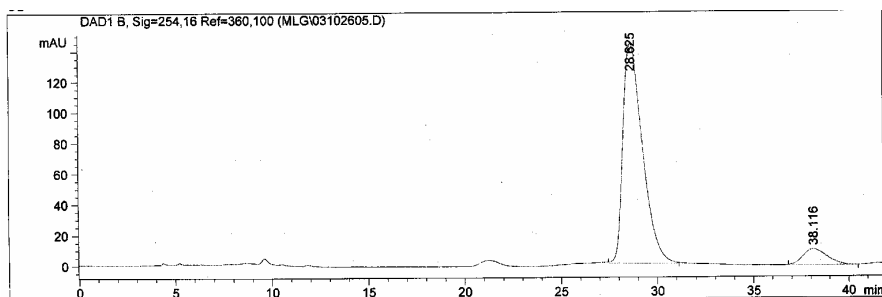

#### Area Percent Report

Sorted By : Signal  
Multiplier : 1.0000  
Dilution : 1.0000

Signal 1: DAD1 B, Sig=254,16 Ref=360,100

| Peak # | RetTime [min] | Type | Width [min] | Area [mAU*s] | Height [mAU] | Area %  |
|--------|---------------|------|-------------|--------------|--------------|---------|
| 1      | 28.625        | BB   | 1.0886      | 1.01151e4    | 143.10440    | 91.7460 |
| 2      | 38.116        | BP   | 1.3770      | 910.00647    | 10.35755     | 8.2540  |

Totals : 1.10251e4 153.46195

3e

Racemate

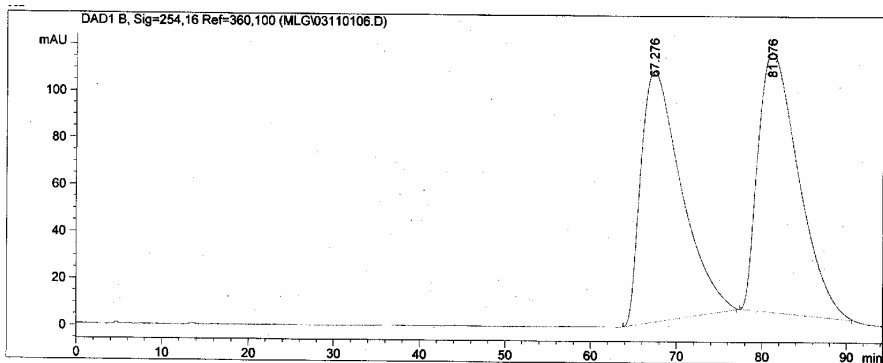

Area Percent Report

Sorted By : Signal  
Multiplier : 1.0000  
Dilution : 1.0000

Signal 1: DAD1 B, Sig=254,16 Ref=360,100

| Peak # | RetTime [min] | Type | Width [min] | Area [mAU*s] | Height [mAU] | Area %  |
|--------|---------------|------|-------------|--------------|--------------|---------|
| 1      | 67.276        | BB   | 3.8656      | 3.51550e4    | 107.09793    | 48.8130 |
| 2      | 81.076        | BB   | 3.9023      | 3.68648e4    | 111.01113    | 51.1870 |

Totals : 7.20198e4 218.10906

(2S,3R)-Enantiomer

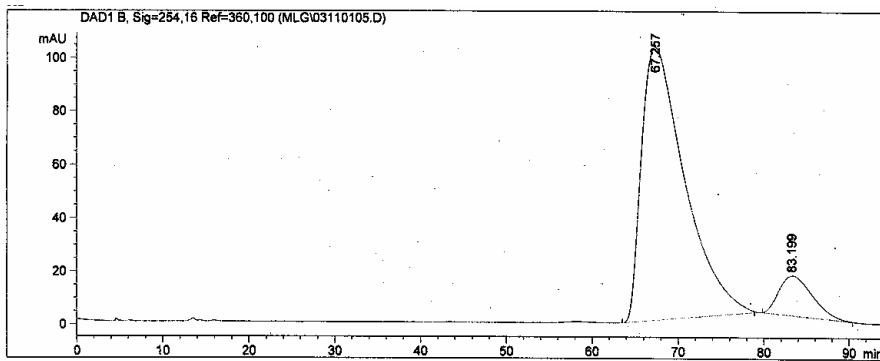

Area Percent Report

Sorted By : Signal  
Multiplier : 1.0000  
Dilution : 1.0000

Signal 1: DAD1 B, Sig=254,16 Ref=360,100

| Peak # | RetTime [min] | Type | Width [min] | Area [mAU*s] | Height [mAU] | Area %  |
|--------|---------------|------|-------------|--------------|--------------|---------|
| 1      | 67.257        | BB   | 4.1223      | 3.58817e4    | 102.59443    | 89.5922 |
| 2      | 83.199        | BB   | 3.2357      | 4168.34424   | 15.09465     | 10.4078 |

Totals : 4.00501e4 117.68907

3f

Racemate

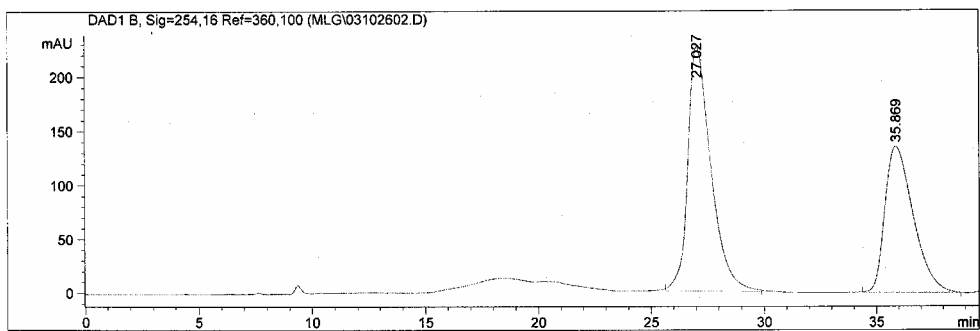

Area Percent Report

Sorted By : Signal  
Multiplier : 1.0000  
Dilution : 1.0000

Signal 1: DAD1 B, Sig=254,16 Ref=360,100

| Peak # | RetTime [min] | Type | Width [min] | Area [mAU*s] | Height [mAU] | Area %  |
|--------|---------------|------|-------------|--------------|--------------|---------|
| 1      | 27.027        | BB   | 1.0745      | 1.61520e4    | 225.82196    | 57.4041 |
| 2      | 35.869        | BP   | 1.3709      | 1.19853e4    | 135.11165    | 42.5959 |

Totals : 2.81373e4 360.93361

(2S,3R)-Enantiomer

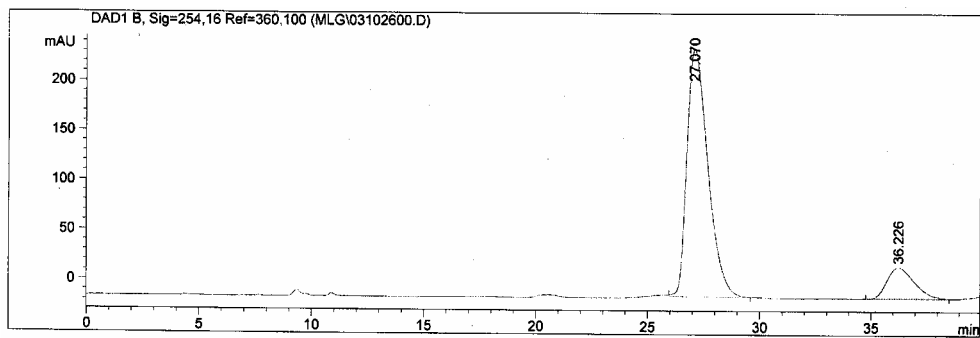

Area Percent Report

Sorted By : Signal  
Multiplier : 1.0000  
Dilution : 1.0000

Signal 1: DAD1 B, Sig=254,16 Ref=360,100

| Peak # | RetTime [min] | Type | Width [min] | Area [mAU*s] | Height [mAU] | Area %  |
|--------|---------------|------|-------------|--------------|--------------|---------|
| 1      | 27.070        | BB   | 1.0099      | 1.61933e4    | 247.97229    | 85.6869 |
| 2      | 36.226        | PP   | 1.3423      | 2704.93188   | 31.35977     | 14.3131 |

Totals : 1.88982e4 279.33206

3g  
Racemate

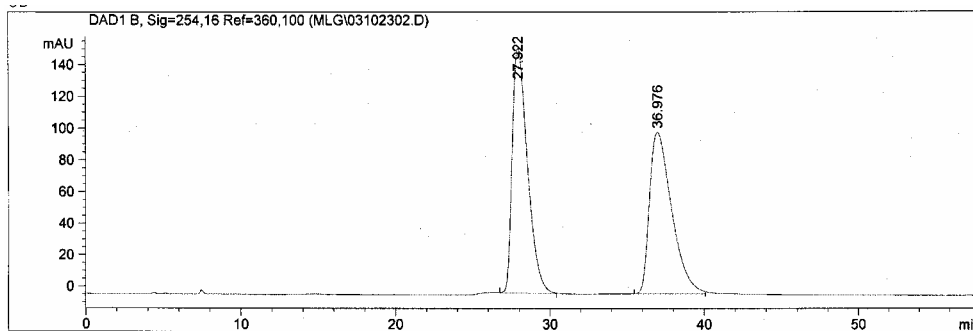

=====  
Area Percent Report  
=====

Sorted By : Signal  
Multiplier : 1.0000  
Dilution : 1.0000

Signal 1: DAD1 B, Sig=254,16 Ref=360,100

| Peak # | RetTime [min] | Type | Width [min] | Area [mAU*s] | Height [mAU] | Area %  |
|--------|---------------|------|-------------|--------------|--------------|---------|
| 1      | 27.922        | BB   | 1.0618      | 1.06847e4    | 154.69186    | 51.0566 |
| 2      | 36.976        | BB   | 1.5296      | 1.02425e4    | 102.16978    | 48.9434 |

Totals : 2.09272e4 256.86164

(2S,3R)-Enantiomer

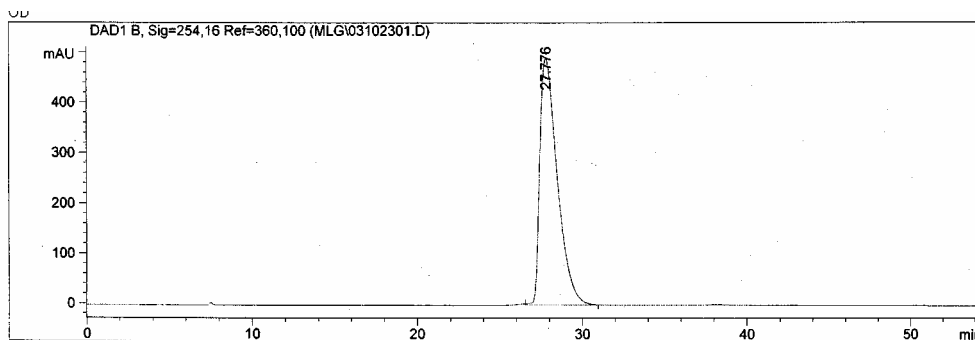

=====  
Area Percent Report  
=====

Sorted By : Signal  
Multiplier : 1.0000  
Dilution : 1.0000

Signal 1: DAD1 B, Sig=254,16 Ref=360,100

| Peak # | RetTime [min] | Type | Width [min] | Area [mAU*s] | Height [mAU] | Area %   |
|--------|---------------|------|-------------|--------------|--------------|----------|
| 1      | 27.776        | BB   | 1.1344      | 3.62390e4    | 490.22571    | 100.0000 |

Totals : 3.62390e4 490.22571

3h

Racemate

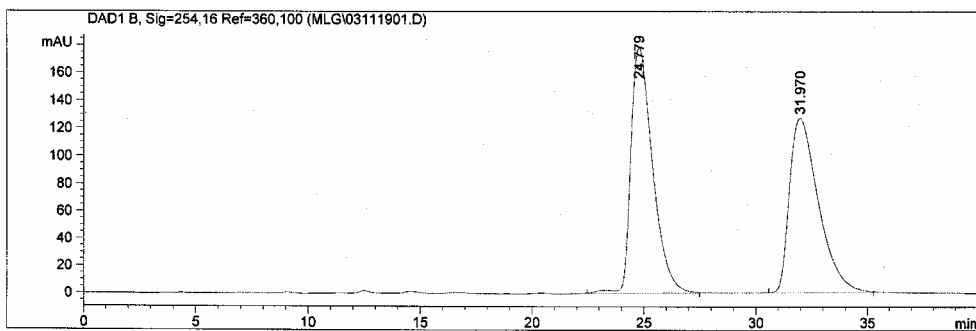

Area Percent Report

Sorted By : Signal  
Multiplier : 1.0000  
Dilution : 1.0000

Signal 1: DAD1 B, Sig=254,16 Ref=360,100

| Peak # | RetTime [min] | Type | Width [min] | Area [mAU*s] | Height [mAU] | Area %  |
|--------|---------------|------|-------------|--------------|--------------|---------|
| 1      | 24.779        | BB   | 1.0499      | 1.22219e4    | 178.70891    | 51.4587 |
| 2      | 31.970        | BB   | 1.4023      | 1.15290e4    | 127.09128    | 48.5413 |

Totals : 2.37509e4 305.80019

(2S,3R)-Enantiomer

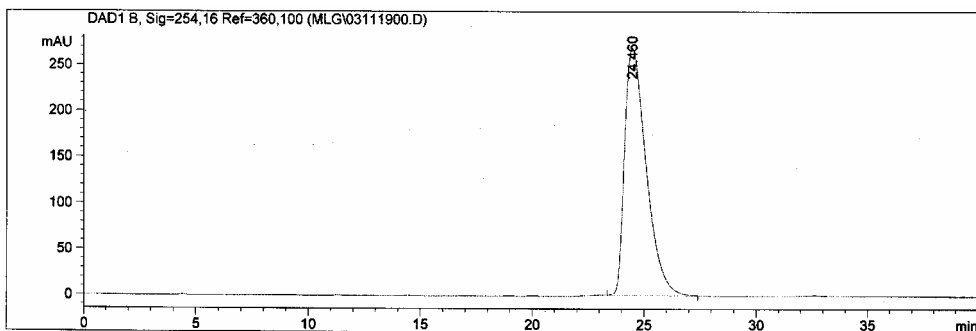

Area Percent Report

Sorted By : Signal  
Multiplier : 1.0000  
Dilution : 1.0000

Signal 1: DAD1 B, Sig=254,16 Ref=360,100

| Peak # | RetTime [min] | Type | Width [min] | Area [mAU*s] | Height [mAU] | Area %   |
|--------|---------------|------|-------------|--------------|--------------|----------|
| 1      | 24.460        | BB   | 1.0328      | 1.80803e4    | 268.78641    | 100.0000 |

Totals : 1.80803e4 268.78641

3i

### Racemate

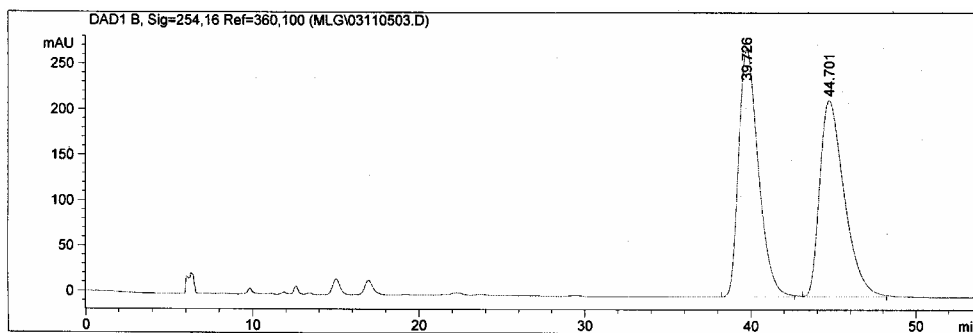

#### Area Percent Report

Sorted By : Signal  
Multiplier : 1.0000  
Dilution : 1.0000

Signal 1: DAD1 B, Sig=254,16 Ref=360,100

| Peak # | RetTime [min] | Type | Width [min] | Area [mAU*s] | Height [mAU] | Area %  |
|--------|---------------|------|-------------|--------------|--------------|---------|
| 1      | 39.726        | BB   | 1.2775      | 2.24892e4    | 271.75940    | 50.1621 |
| 2      | 44.701        | BB   | 1.5832      | 2.23438e4    | 215.94388    | 49.8379 |

Totals : 4.48330e4 487.70328

### (2S,3R)-Enantiomer

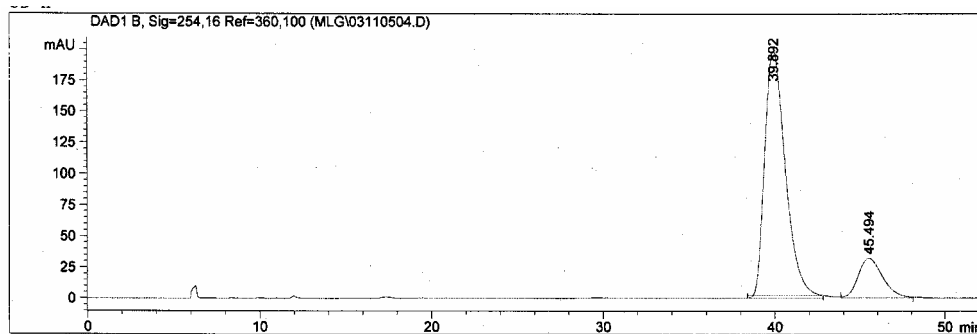

#### Area Percent Report

Sorted By : Signal  
Multiplier : 1.0000  
Dilution : 1.0000

Signal 1: DAD1 B, Sig=254,16 Ref=360,100

| Peak # | RetTime [min] | Type | Width [min] | Area [mAU*s] | Height [mAU] | Area %  |
|--------|---------------|------|-------------|--------------|--------------|---------|
| 1      | 39.892        | BB   | 1.3005      | 1.68783e4    | 199.20110    | 83.9060 |
| 2      | 45.494        | BB   | 1.5554      | 3237.42017   | 32.24350     | 16.0940 |

Totals : 2.01157e4 231.44460



3a'

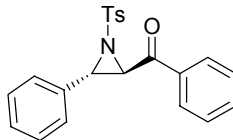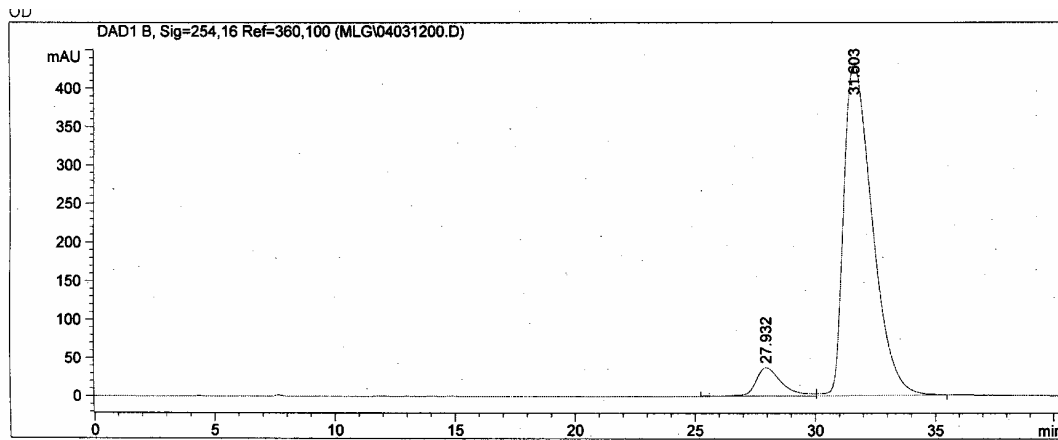

=====  
Area Percent Report  
=====

Sorted By : Signal  
Multiplier : 1.0000  
Dilution : 1.0000

Signal 1: DAD1 B, Sig=254,16 Ref=360,100

| Peak # | RetTime [min] | Type | Width [min] | Area [mAU*s] | Height [mAU] | Area %  |
|--------|---------------|------|-------------|--------------|--------------|---------|
| 1      | 27.932        | PV   | 1.0976      | 2769.52002   | 37.07144     | 7.2198  |
| 2      | 31.603        | VB   | 1.2704      | 3.55907e4    | 429.66614    | 92.7802 |

Totals : 3.83603e4 466.73758

3b

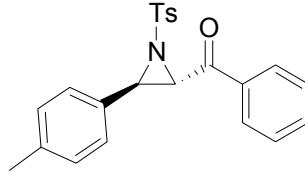

```

MLG110-p-Meaziridine
exp1 std1h
SAMPLE
date Oct 13 2003 dffrq 300.068
solvent CDCl3 dn H1
file exp dpwr 40
ACQUISITION acf c
sfrq 300.069 dm hnn
tn H1 dm c
st 1.599 dmf 200
np 18016 PROCESSING
sw 4508.5 wf file
fb not used pFoc ft
bs 4 Fn 32768
tpwr 60
pu 4.6 werr
d1 1.000 wexp
tof 630.0 wbs
nt 16 wnt
ct 16
alock n
gain 4
FLAGS
il n
in n
dp y
DISPLAY
sp -78.9
wp 3678.8
vs 114
sc 0
wc 250
hzmm 14.72
is 8437.84
ffl 179.3
rfp 0
ln 3
ins 3.000
nm ph

```

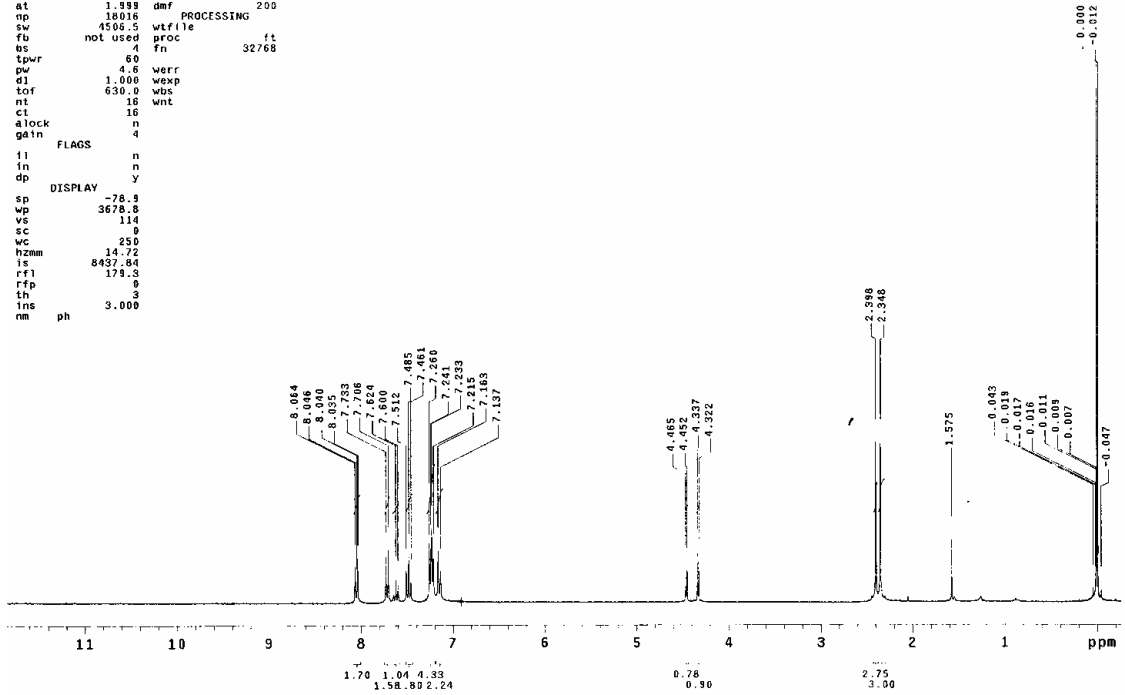

3b

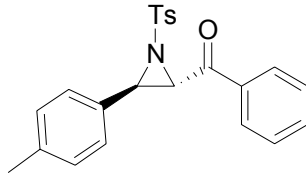

```

MLG110-p-Meaziridine
exp2 std13c
SAMPLE
date Oct 13 2003 dfrq DEC. & VT 300.070
solvent DMSO dn H1
file exp dpwr 40
ACQUISITION exp ddf 0
sfrq 75.461 dn yyy
tn C13 dmm w
at 1.500 dmf 15300
np 58604 PROCESSING
sw 18867.9 lb 1.00
fb not used wifile
ls 16 proc ft
tpwr 59 fn not used
pw 3.0
d1 1.000 werr
tof 1130.0 wexp
nt 10000 wbs
Cl 1552 wnt
aLock n
gain not used
FLAGS
il n
in n
dp y
DISPLAY
sp 19.9
wp 16589.4
vs 71
sc 0
wc 250
h2mm 66.26
fs 509.00
rfi 6226.4
rfp 5809.8
th 3
ins 77.000
nm no ph
  
```

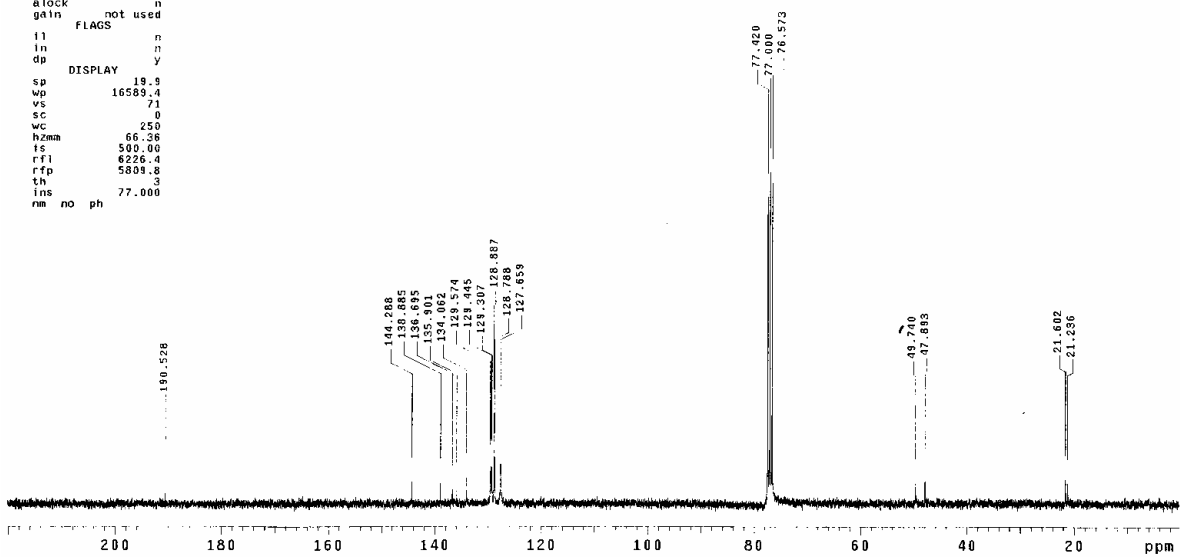

3c

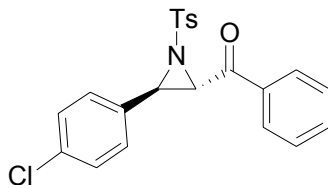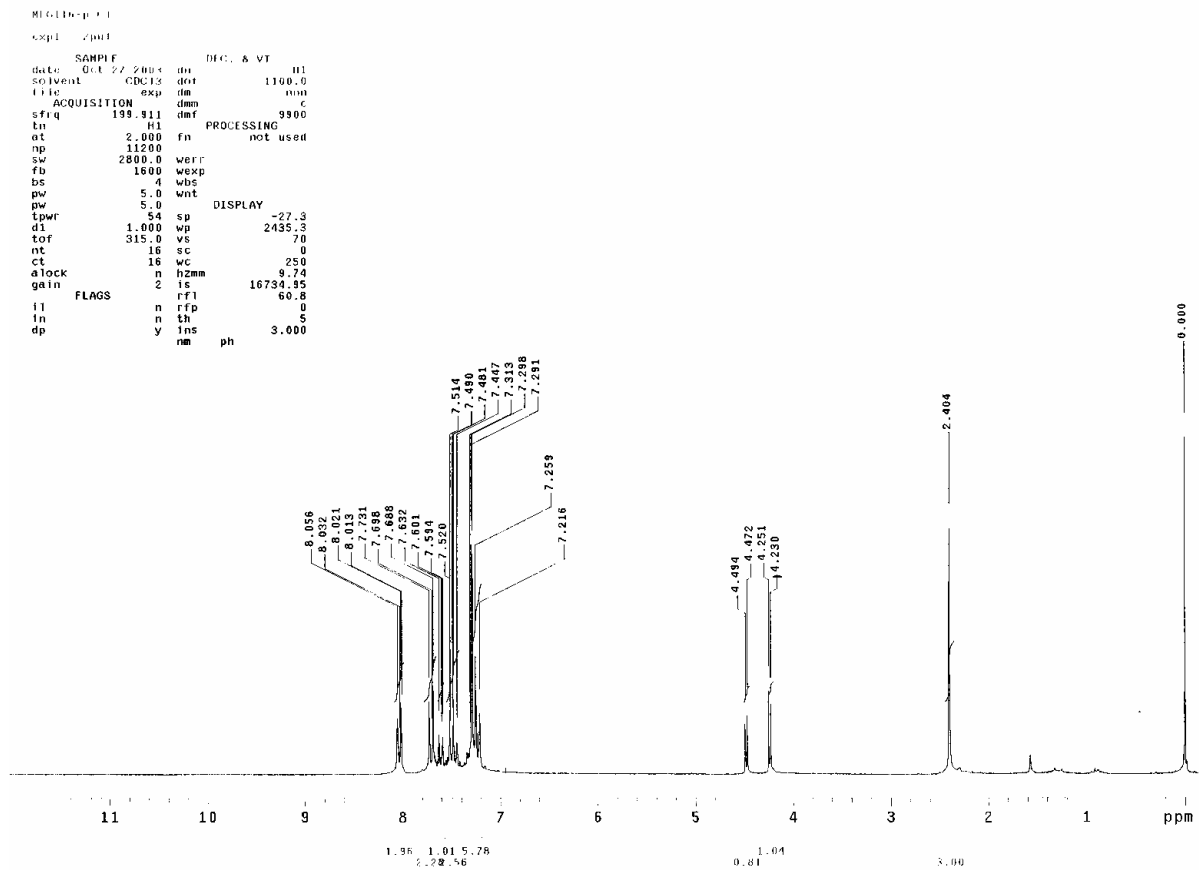

3c

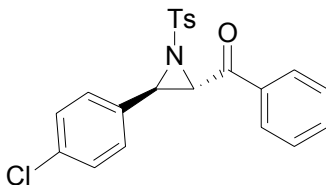

```
NAME: 3c
EXP: 170101
SAMPLE
DATE: 07.12.2005 DIR: & VI 195.911
SOLVENT: CDCl3 DO: 0
FILE: ACQUISITION EXP: 05
STR: 50.273 DM: 1100.0
LN: C13 DMM: W
AT: 1.500 DMF: 9900
NP: 37504 PROCESSING
SW: 12500.0 WTFILE: FT
FB: 7000 PROC: FT
BS: 4 FN: NOT USED
TPWR: 54
PW: 6.0 WERR:
DI: 1.000 WEXP:
TOF: 959.0 WBS:
NT: 100000 WNT:
CT: 1172
ALOCK: N
GAIN: 20
FLAGS
I1: N
I2: N
DP: Y
DISPLAY
SP: 9.2
WP: 11103.4
VS: 34
SC: 0
WC: 250
HZMM: 44.41
IS: 500.00
RF1: 4288.2
RF2: 3870.6
TH: 4
INS: 77.000
NM: NO PH
```

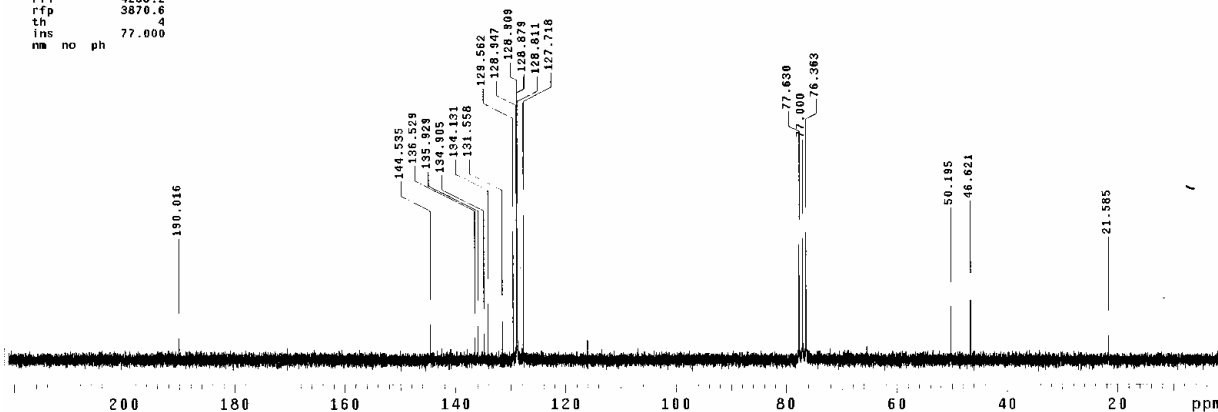

3d

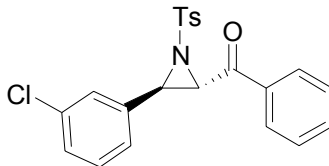

```
MLG123 m-C1
exp1 s2pu1
SAMPLE SPECIAL
date Oct 28 2003 temp not used
solvent CDCl3 gain not used
file exp spin not used
ACQUISITION hst 0.008
sw 4564.1 pw90 9.500
at 2.001 alfa 20.000
np 18262 FLAGS
fd not used il n
bs 4 in n
d1 1.000 dp y
nt 16 hs mn
ct 16 PROCESSING
TRANSMITTER fn 65536
tn H1 DISPLAY
sfrq 300.067 sp -73.5
tof 645.7 wp 3688.2
tpwr 60 rft 149.2
pw 4.750 rfg 0
DECOUPLER rp -10.2
dn C13 lp -77.8
dof 0 PLOT
dm nmr wc 250
dmm c sc 9
dpr 42 vs 73
dmf 19400 th 6
nm pb
```

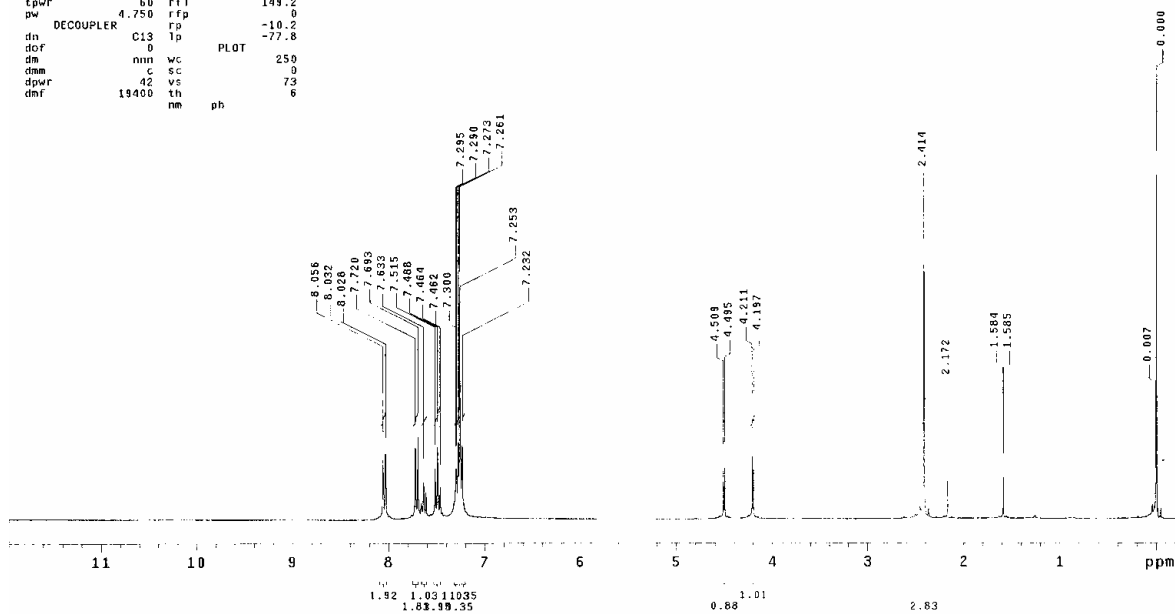

3d



```
MLG123 m-C1
exp2 std13c
SAMPLE
date Oct 28 2003 dfrq 300.066
solvent CDC13 dn H1
file exp dpr 70
ACQUISITION
sfrq 75.460 dm yyy
tn C13 dmm w
at 1.500 dir 11200
np 58822
sw 19607.8 lb 1.00
fb 10000 wfile
bs 16 gpc ft
tpwr 59 fn not used
pw 4.0
d1 1.000 werr
tof 1195.0 wexp
nt 10000 wbs
ct 256 wnt
alock n
gain not used
FLAGS
il n
ln n
dp y
DISPLAY
sp 1.8
wg 16623.1
vs 2.1
sc 0
wc 250
hzmm 66.49
is 16+03
rf1 6878.4
rfp 5809.8
th 2
tms 1.000
nm no ph
```

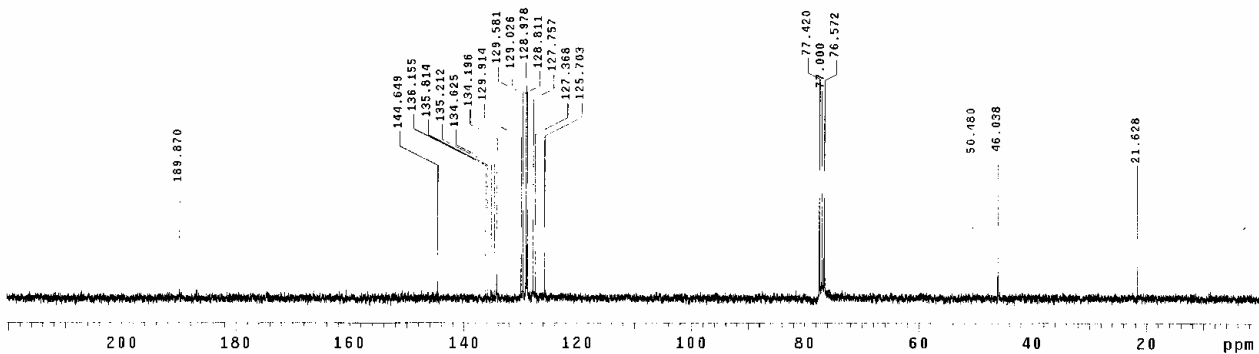

3e

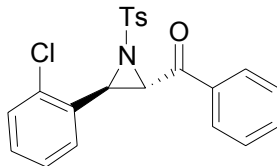

```
04124001
exp1 /zpu1
SAMPLE          DEC. & VI
date    Oct 27 2000   dm          H1
solvent  CDCl3      dm1         1100.0
file     exp1       dm          1100
ACQUISITION    dmm          C
sfrq     199.911    dmf         9900
to       H1        PROCESSING
at       2.000     fn          not used
np       11200
sw       2800.0   werr
fb       1600    wexp
ds       4       wbs
pw       5.0     wnt
pw       5.0
tpwr     54      sp          DISPLAY
d1       1.000   wp          -40.7
tcf     315.0   vs          2448.2
nt       16     sc          90
ct       16     wc          250
clock   2      hzmm         9.78
gain    2      is          11485.90
FLAGS    n     rfl          61.2
ll       n     rfp          0
ln       n     th          9
dp       y     ins         3.000
nm       ph
```

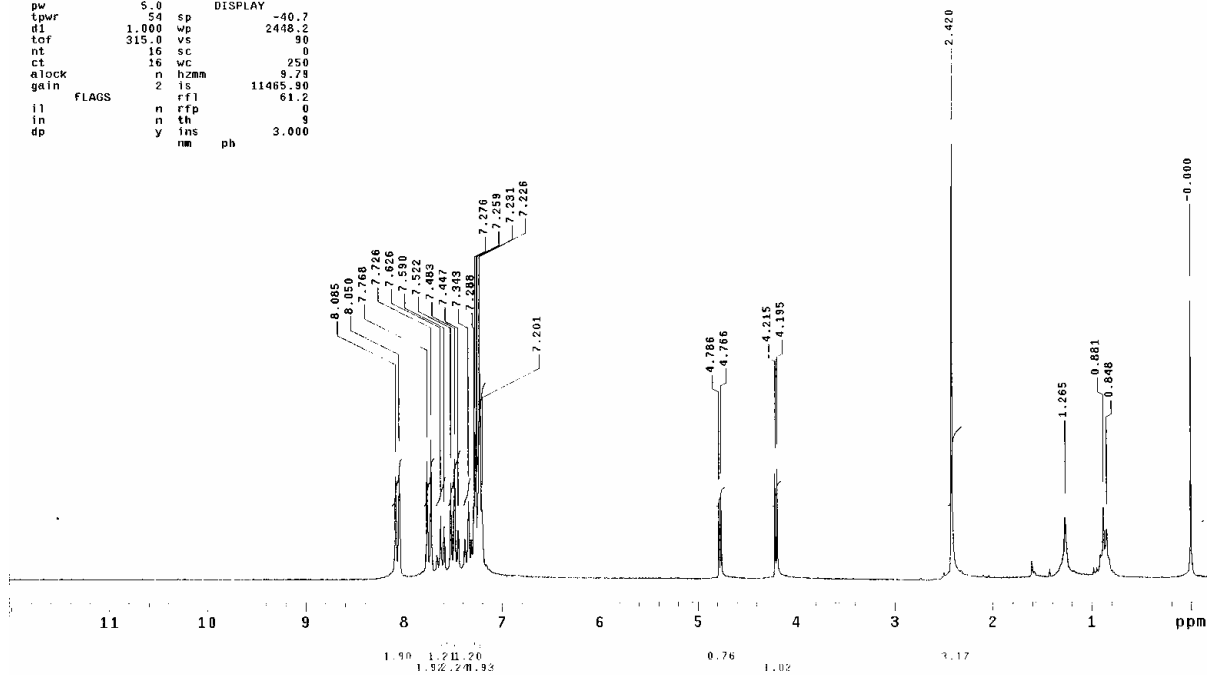



3e

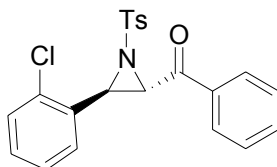

```

M0114601
exp: 011306
SAMPLE
date 01/27/2005 dir: & VT 199.411
solvent CDCl3 du: HI
file ACQUISITION exp dpwr: 35
ACQUISITION dof: 1100.0
sfrq 50.273 dm: yyy
in C13 dnm: w
at 1.500 dmf: 9300
no 37504
sw 12500.0 wtfile:
fb 7000 proc: ft
bs 4 fn: not used
tpwr 54
pw 6.0 wefr:
di 1.000 wexp:
tof 950.0 wbs:
nt 100000 wnt:
ct 432
alock n
gain 20
FLAGS
il n
in n
dp y
DISPLAY
sp -61.0
wp 11126.3
vs 22
sc 0
wc 250
hzmm 44.51
is 500.00
rfi 4288.0
rfp 3870.6
th 3
ins 77.000
nm no ph
  
```

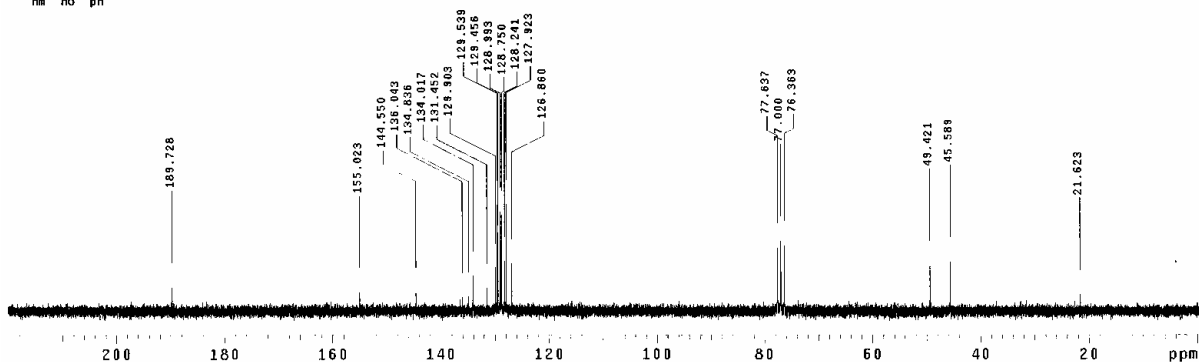

3f

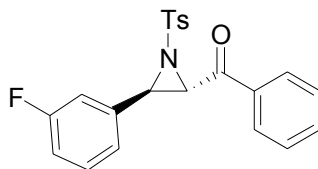

```

MUG150 m f
exp1 42p01
SAMPLE
date Oct 27 2004 dm DEC. A VI H1
solvent CDCl3 dcf 1100.0
file exp dm 000
ACQUISITION
sfrq 159.911 dmf 9900
tn H1 PROCESSING
at 2.000 fn not used
np 11200
sw 2800.0 werr
fb 1600 wexp
bs 4 wbs
pw 5.0 wnt
tpwr 54 sp DISPLAY
di 1.000 wp 2440.4
tof 315.0 vs 108
nt 16 sc 0
ct 16 wc 250
alock n hzmm 9.76
gain 2 is 23992.76
FLAGS
f1 n rfl 0
in n th 7
dp y ins 3.000
nm ph
  
```

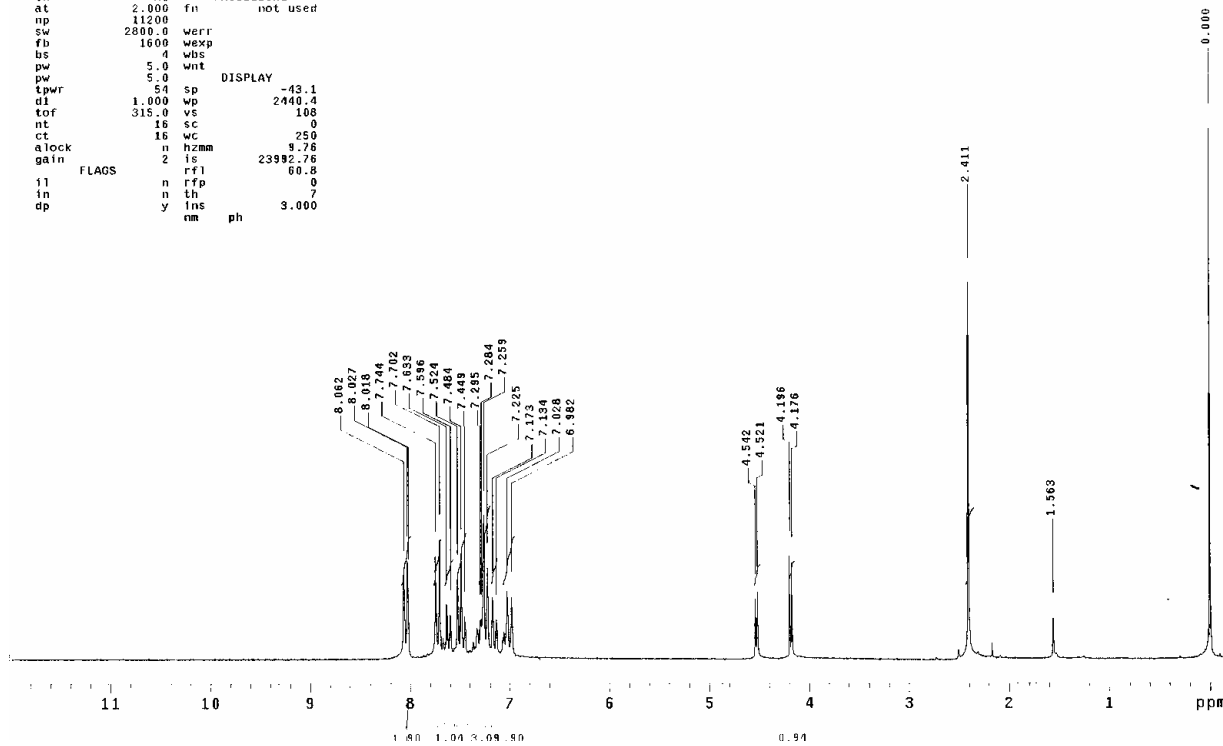

3f



HL6120-m-1

exp2 541156

```

SAMPLE          DFC: & VT
date   Oct 27 2004   d11 q   199.911
solvent CDCl3       du   q   H1
file    exp         dpwf    35
ACQUISITION      dof     1100.0
sfrq     50.273    sm      yy
tn       C13       dnm     w
at       1.500     dmf     9900
np       37504     PROCESSING
sw       12500.0   wtf file
fb       7000     proc
bs       4        fn      not used
tpwr     54
pw       6.0     werr
d1       1.000   wexp
tof      550.0   wbs
nt       100000  wnt
ct       872
alock    n
gain     20
  FLAGS
  il     n
  in     n
  dp     y
  DISPLAY
  sp     -25.1
  wp     11103.4
  vs     24
  sc     0
  wc     250
  hzmm   44.41
  is     500.00
  rfl    4287.3
  rfp    3870.6
  th     3
  tns    77.000
nm no ph
  
```

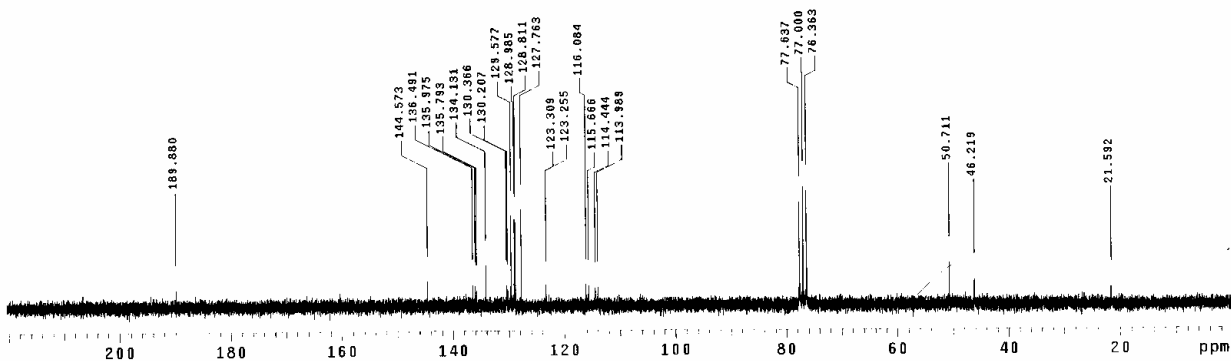

3g

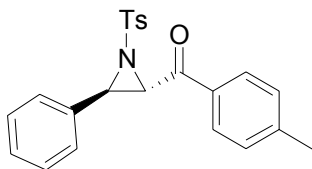

HIGH-RESOLUTION NMR

exp1 3p01

```
SAMPLE1          DEC  8  VI
date   Dec  8  2003  dd      1100.0  H1
solvent CDCl3      dof      1100.0  mm
file   exp         dm       9900    C
ACQUISITION      dnm
sfrq   199.911    dmf      9900
tn     H1         PROCESSING
at     2.000      fm       not used
np     11200
sw     2800.0    werr
fb     1600      wexp
bs     1         wbs
pw     5.0       wnt
tpwr   5.0      DISPLAY
di     1.000    sp       -29.1
tof    315.0    vs       2436.6
nt     16      sc       79
ct     18      wc       250
alock  n       hzma    9.75
gain   2       rfl     26264.64
        y       ins     61.2
        n       rfp     0
        n       th     5
        y       ins     3.000
        nm      ph
```

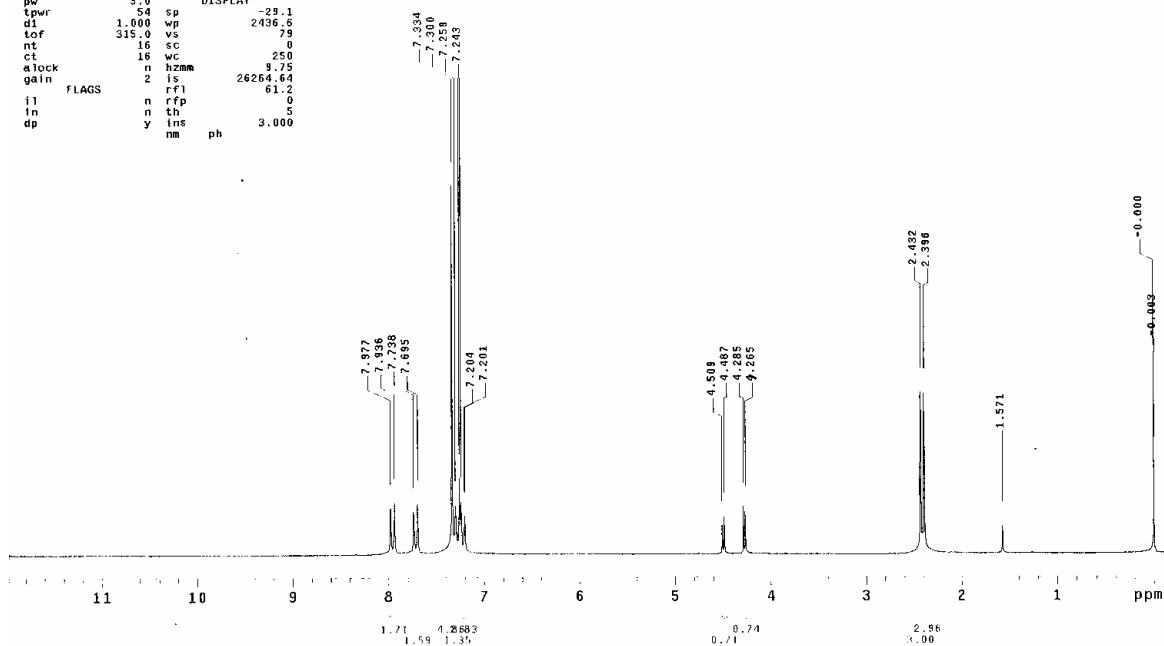

3g

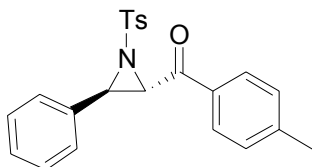

```
MG118-p-Me
exp2 1d13c
SAMPLE
date Gr1 24 2004 dt19 199.411
solvent CDCl3 an H1
file ACQUISITION exp opwi 35
ACQUISITION dof 1100.0
sfrq 50.273 dm YYY
tn C13 dmm w
at 1.500 dmf 9900
np 37504 PROCESSING
sw 12500.0 wtfile
fb 7000 proc ft
bs 4 fn not used
tpwr 54
pw 6.0 werr
d1 1.000 wexp
tof 950.0 wbs
nt 100000 wnt
ct 608
alock n
gain 20
FLAGS
il n
in n
dp y
DISPLAY
sp -61.0
wp 11114.8
vs 27
sc 0
wc 250
hzm 40.46
is 500.00
rf1 4289.0
rfp 3870.6
th 3
ins 77.000
nm no ph
```

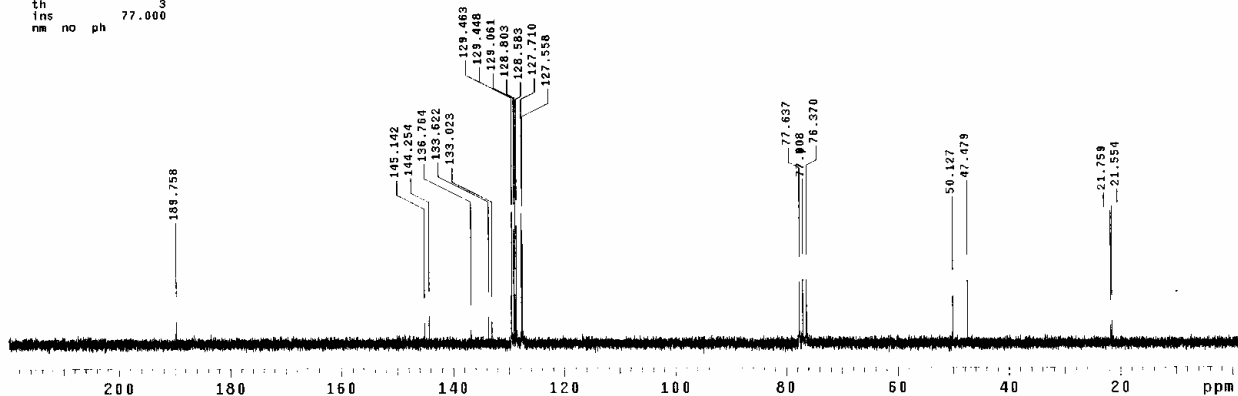

3h

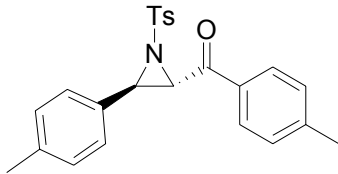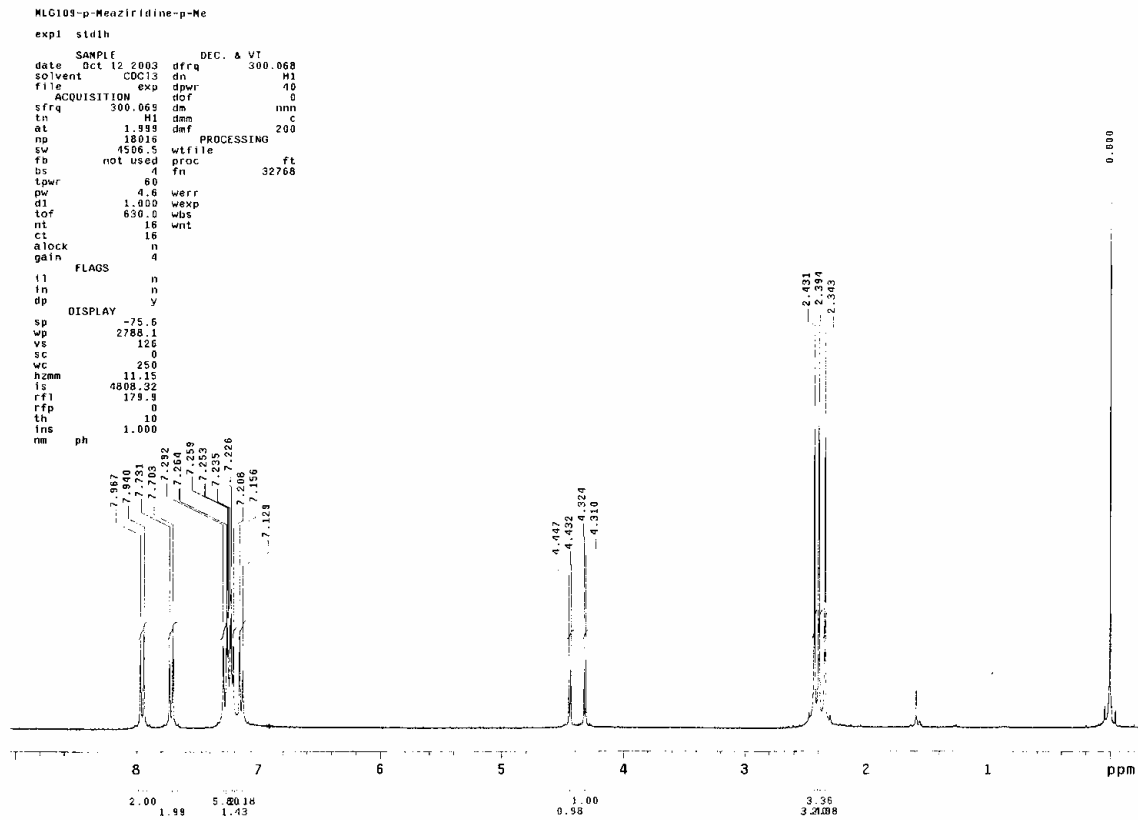

3h

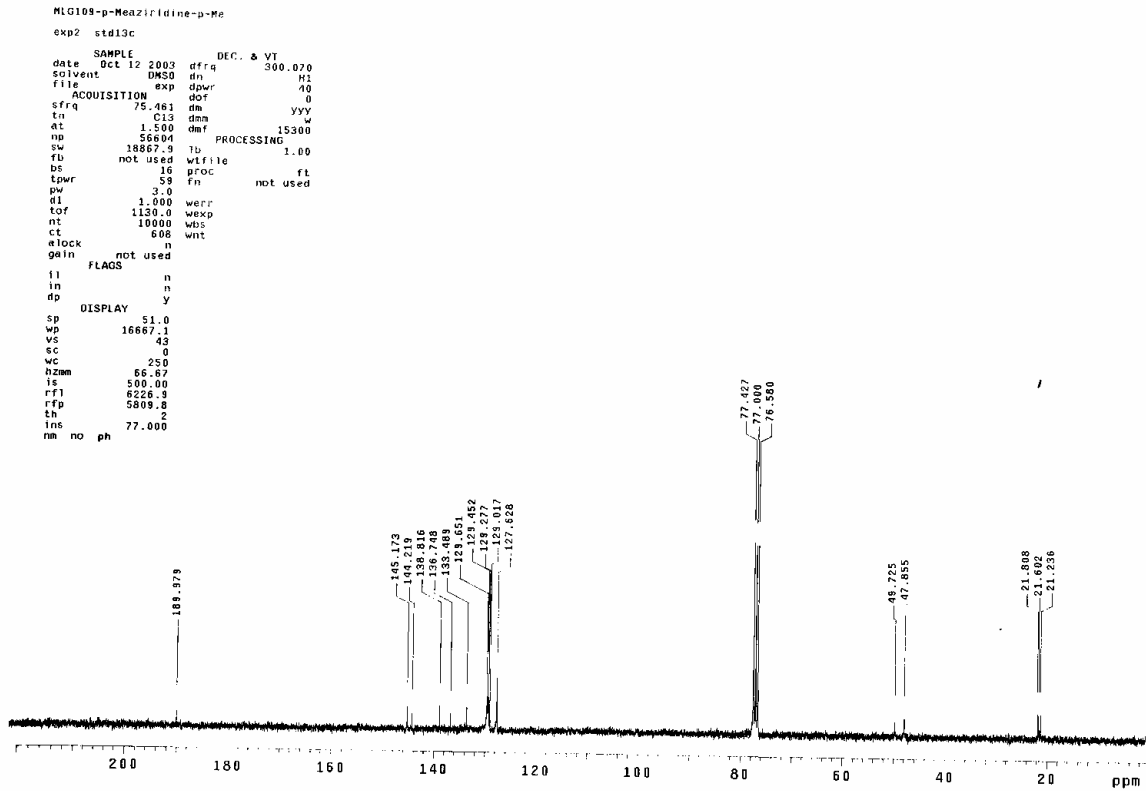

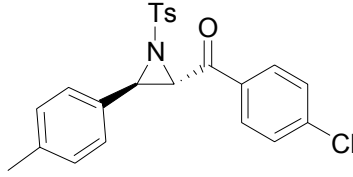

```

NAME: 1-(4-chlorophenyl)-2-(4-methylphenyl)aziridine
EXP: 2004
SAMPLE: OFF: 8 VI
Date: Nov 4 2004   DR: H1
Solvent: CDCl3   DR1: 1100.0
File: exp   dm: mm
ACQUISITION: dm: c
Sf: 199.911   dmf: 9900
tn: H1   PROCESSING:
at: 2.000   fn: not used
np: 11200
sw: 28000.0   werr:
fb: 1600   wexp:
bs: 4   wbs:
pw: 5.0   wnt:
pwr: 5.0   DISPLAY:
tpr: S4   sp: -22.2
d1: 1.000   wp: 2417.1
tof: 315.0   vs: 162
nt: 16   sc: 0
ct: 16   wc: 250
alock: n   hzmm: 9.67
gain: 2   fs: 122927.45
FLAGS: FT1   ffp: 0
il: n   rfp: 0
in: n   th: 2
dp: y   lns: 2
nm: ph   2.000
  
```

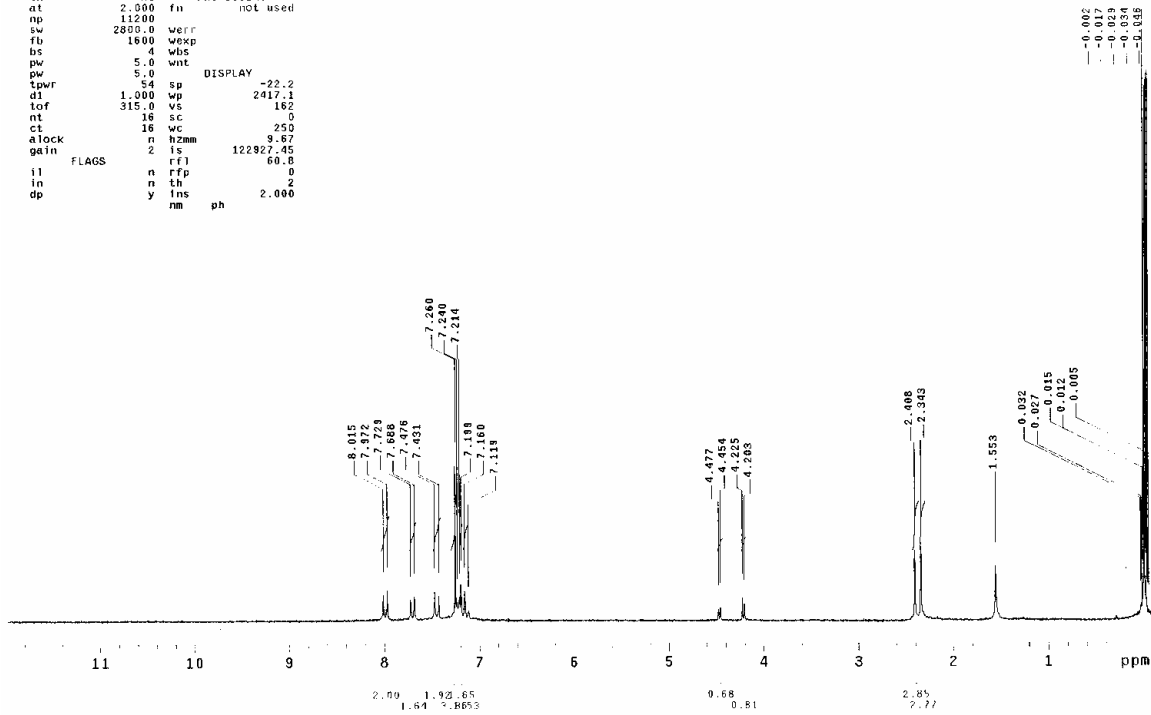



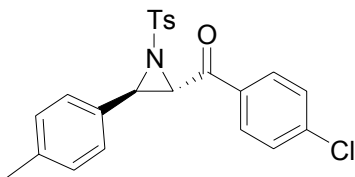

```

MLG135 (p-Me)PhCH=CHCOPh(p-Cl)
exp2 std13c
SAMPLE
date Nov 6 2003 dffrq 300.066
solvent CDCl3 dn H1
file ACQUISITION exp dpwr 40
sfrq 75.460 da 0
tn C13 dmm w
at 1.500 dmf 11200
np 58822 PROCESSING
sw 19607.8 lb 1.00
fb 10800 wtfile
bs 16 proc ft
tpwr 58 fn not used
pw 4.0
dl 1.000 werr
tof 1136.0 wexp
nt 10000 wbs
ct 400 wnt
alock n
gain not used
FLAGS
il n
in n
dp y
DISPLAY -15.5
sp 16623.1
vs 21
sc 0
vc 250
hzmm 66.49
is 1e+09
rfl 6879.6
rfp 5809.8
th 2
ins 1.000
nm no ph
    
```

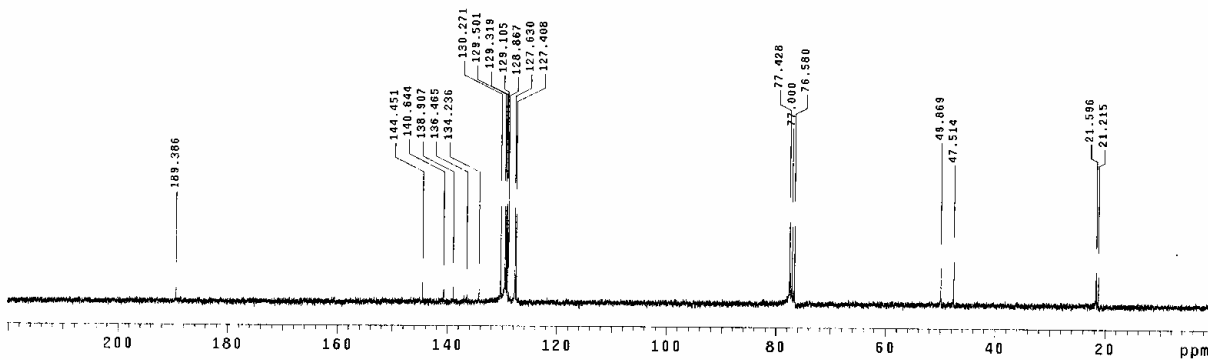

# Diamide

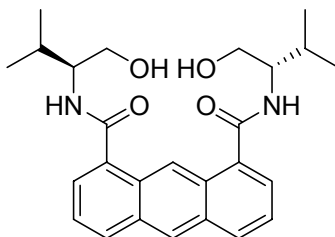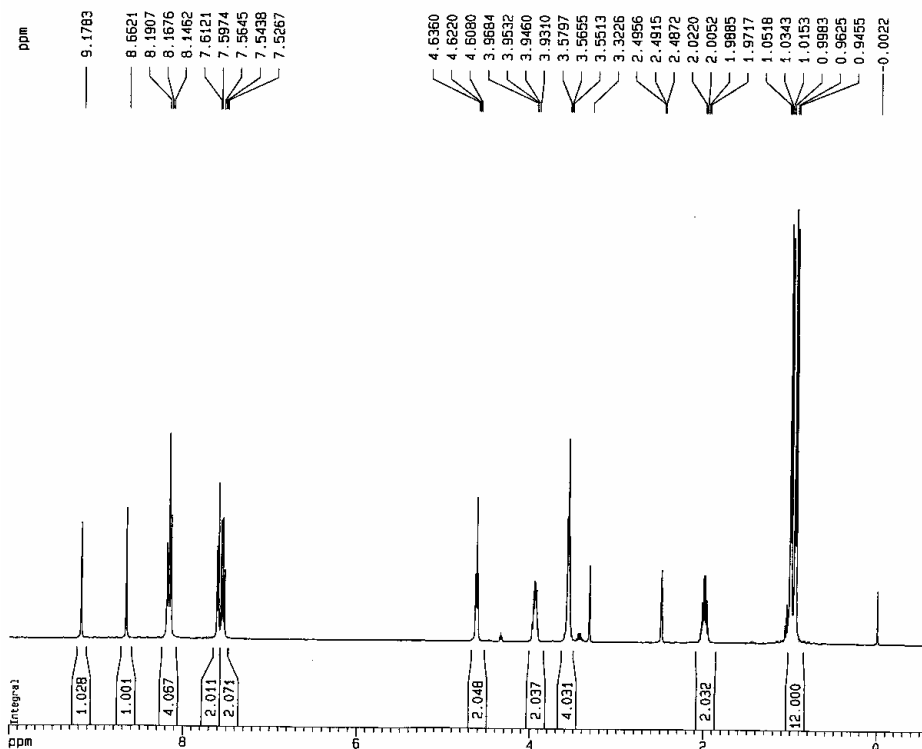

Current Data Parameters  
 NAME h22691  
 EXPNO 1  
 PROCNO 1

F2 - Acquisition Parameters  
 Date\_ 20040513  
 Time 7.59  
 INSTRUM ARX400  
 PROBHD 5 mm Multinu  
 PULPROG zg  
 TD 32768  
 SOLVENT DMSO  
 NS 32  
 DS 0  
 SWH 6578.947 Hz  
 FIDRES 0.200774 Hz  
 AQ 2.4904160 sec  
 RG 715  
 DW 76.000 usec  
 DE 95.00 usec  
 TE 300.0 K  
 D1 2.00000000 sec  
 P1 3.00 usec  
 DE 95.00 usec  
 SFO1 400.1325569 MHz  
 NUCLEUS 1H

F2 - Processing parameters  
 SI 16384  
 SF 400.1300062 MHz  
 WDW no  
 SSB 0  
 LB 0.00 Hz  
 GB 0  
 PC 4.00

1D NMR plot parameters  
 CX 20.00 cm  
 F1P 10.000 ppm  
 F1 4001.30 Hz  
 F2P -0.600 ppm  
 F2 -240.08 Hz  
 PPMCM 0.53000 ppm/cm  
 HZCM 212.06891 Hz/cm

# Diamide

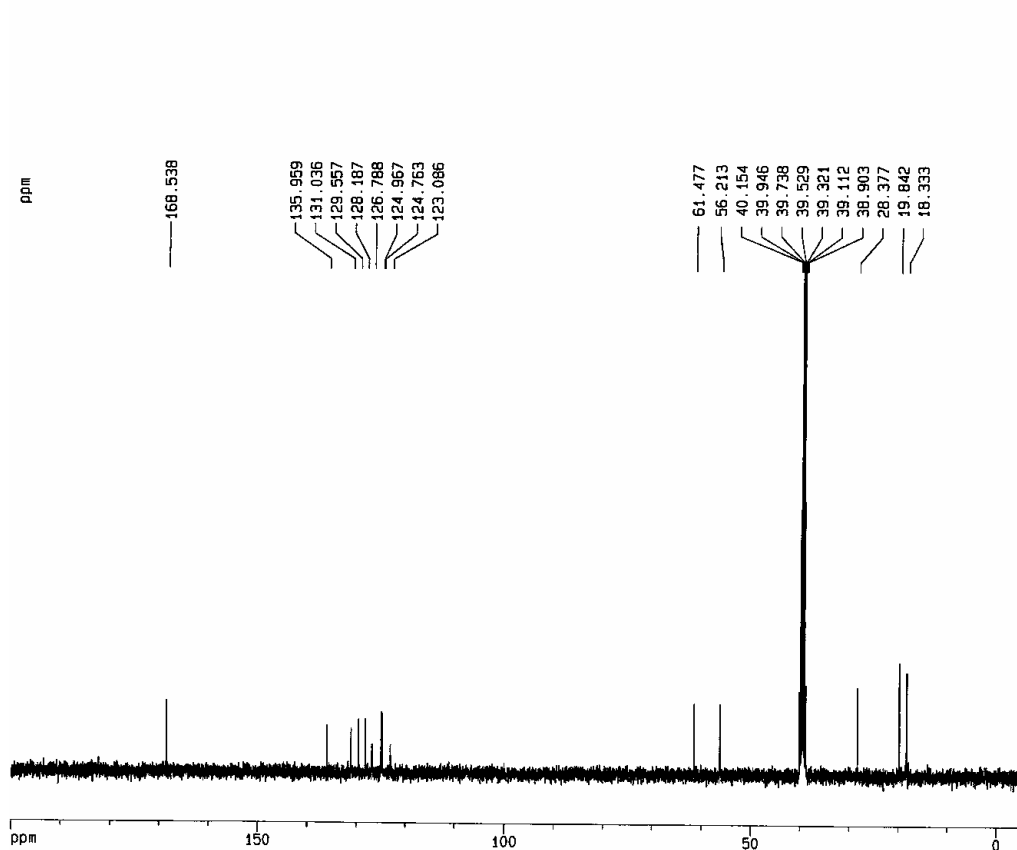

Current Data Parameters  
 NAME c22691  
 EXPNO 1  
 PROCNO 1

F2 - Acquisition Parameters  
 Date\_ 20040513  
 Time 8.04  
 INSTRUM ARX400  
 PROBHD 5 mm Mjltinu  
 PULPROG zgdc  
 TD 32768  
 SOLVENT DMSO  
 NS 241  
 DS 2  
 SMH 29411.766 Hz  
 FIDRES 0.897576 Hz  
 AQ 0.5571060 sec  
 RG 32768  
 DW 17.000 usec  
 DE 24.29 usec  
 TE 300.0 K  
 D12 0.00002000 sec  
 DL5 24.00 dB  
 CPDPRG waltz16  
 P31 100.00 usec  
 D1 2.00000000 sec  
 P1 4.00 usec  
 DE 24.29 usec  
 SFO1 100.6240000 MHz  
 NUCLEUS 13C  
 D11 0.03000000 sec

F2 - Processing parameters  
 SI 32768  
 SF 100.6128180 MHz  
 MDW EM  
 SSB 0  
 LB 1.00 Hz  
 GB 0  
 PC 0.50

1D NMR plot parameters  
 CX 20.00 cm  
 F1P 200.000 ppm  
 F1 20122.56 Hz  
 F2P -5.000 ppm  
 F2 -503.06 Hz  
 PPMCM 10.25000 ppm/cm  
 HZCM 1031.28149 Hz/cm

AnBOX

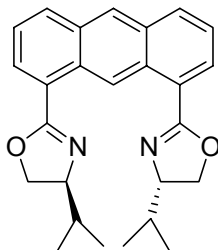

MLG192 Box-val  
 exp1 s2pu1

|             |             |            |          |
|-------------|-------------|------------|----------|
| SAMPLE      |             | SPECIAL    |          |
| date        | Feb 10 2004 | temp       | not used |
| solvent     | CDCl3       | gain       | not used |
| file        |             | exp        | not used |
| ACQUISITION |             | hst        | 0.008    |
| sw          | 4570.4      | pw90       | 1.500    |
| at          | 1.998       | a1fa       | 20.000   |
| np          | 18262       | FLAGS      |          |
| fb          | 2600        | ii         | n        |
| bs          | 4           | in         | n        |
| d1          | 1.000       | dp         | y        |
| nt          | 16          | hs         | nn       |
| ct          | 16          | PROCESSING |          |
| TRANSMITTER |             | fn         | 65536    |
| tn          | H1          | DISPLAY    |          |
| sfrq        | 300.067     | sp         | -29.2    |
| tof         | 645.7       | wp         | 3647.7   |
| tpwr        | 60          | rfl        | 150.2    |
| pw          | 4.750       | rff        | 0        |
| DECOUPLER   |             | rfp        | -9.0     |
| dn          | C13         | lp         | -56.7    |
| dof         | d           | PLOT       |          |
| dm          | nnn         | wc         | 250      |
| dmm         | c           | sc         | 0        |
| dpwr        | 42          | vs         | 62       |
| derf        | 19400       | th         | 5        |
|             |             | nm         | ph       |

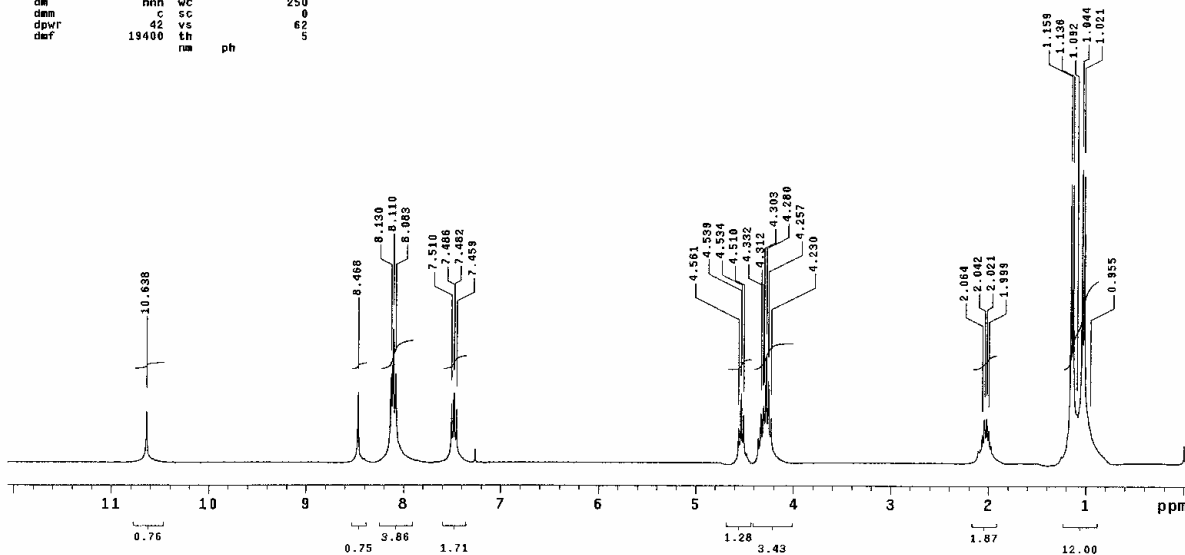

# AnBOX

MLG192 Box-val

exp2 std13c

```
SAMPLE DEC. & VT
date Feb 10 2004 dfrq 300.068
solvent DMSO dn H1
file exp dpwr 46
ACQUISITION dof 0
sfrq 75.460 dm yyyy
tn C13 dmm w
at 1.500 dmf 11200
np 58822 PROCESSING
sw 19607.8 lb 1.00
fb 10800 wtf file
bs 4 proc ft
tpwr 59 fn not used
pw 4.0
d1 1.000 verr
tof 1196.0 wexp
nt 1000 wbs
ct 472 wnt
elock n
gain not used
FLAGS
il n
in n
dp y
DISPLAY
sp -62.2
wp 16752.4
vs 30
sc 0
wc 250
hzmm 67.01
ls 1e+09
rf1 6521.2
rfp 5809.8
th 4
ins 1.000
nm no ph
```

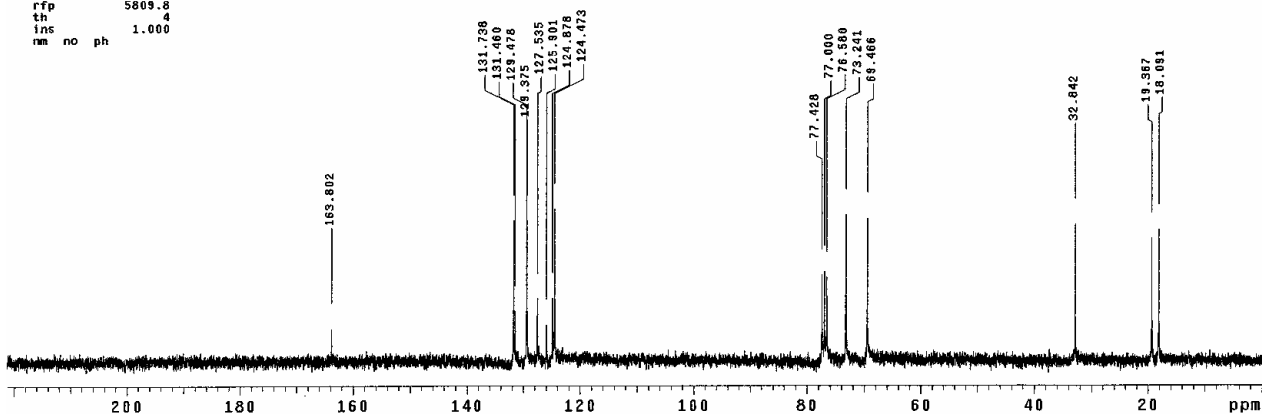

Supplement: b404134h.pdf [file b404134h.pdf]
